# Supplementary material
Source: PubMed Central journal article supplement (PMC5049680)
Supplement: NIHMS69990-supplement-SI.pdf [file NIHMS69990-supplement-SI.pdf]

## **Supplementary Information**

Earle, Wu, Charlesworth, *et al* (2016)

Identifying lineage effects when controlling for population structure improves power in bacterial association studies

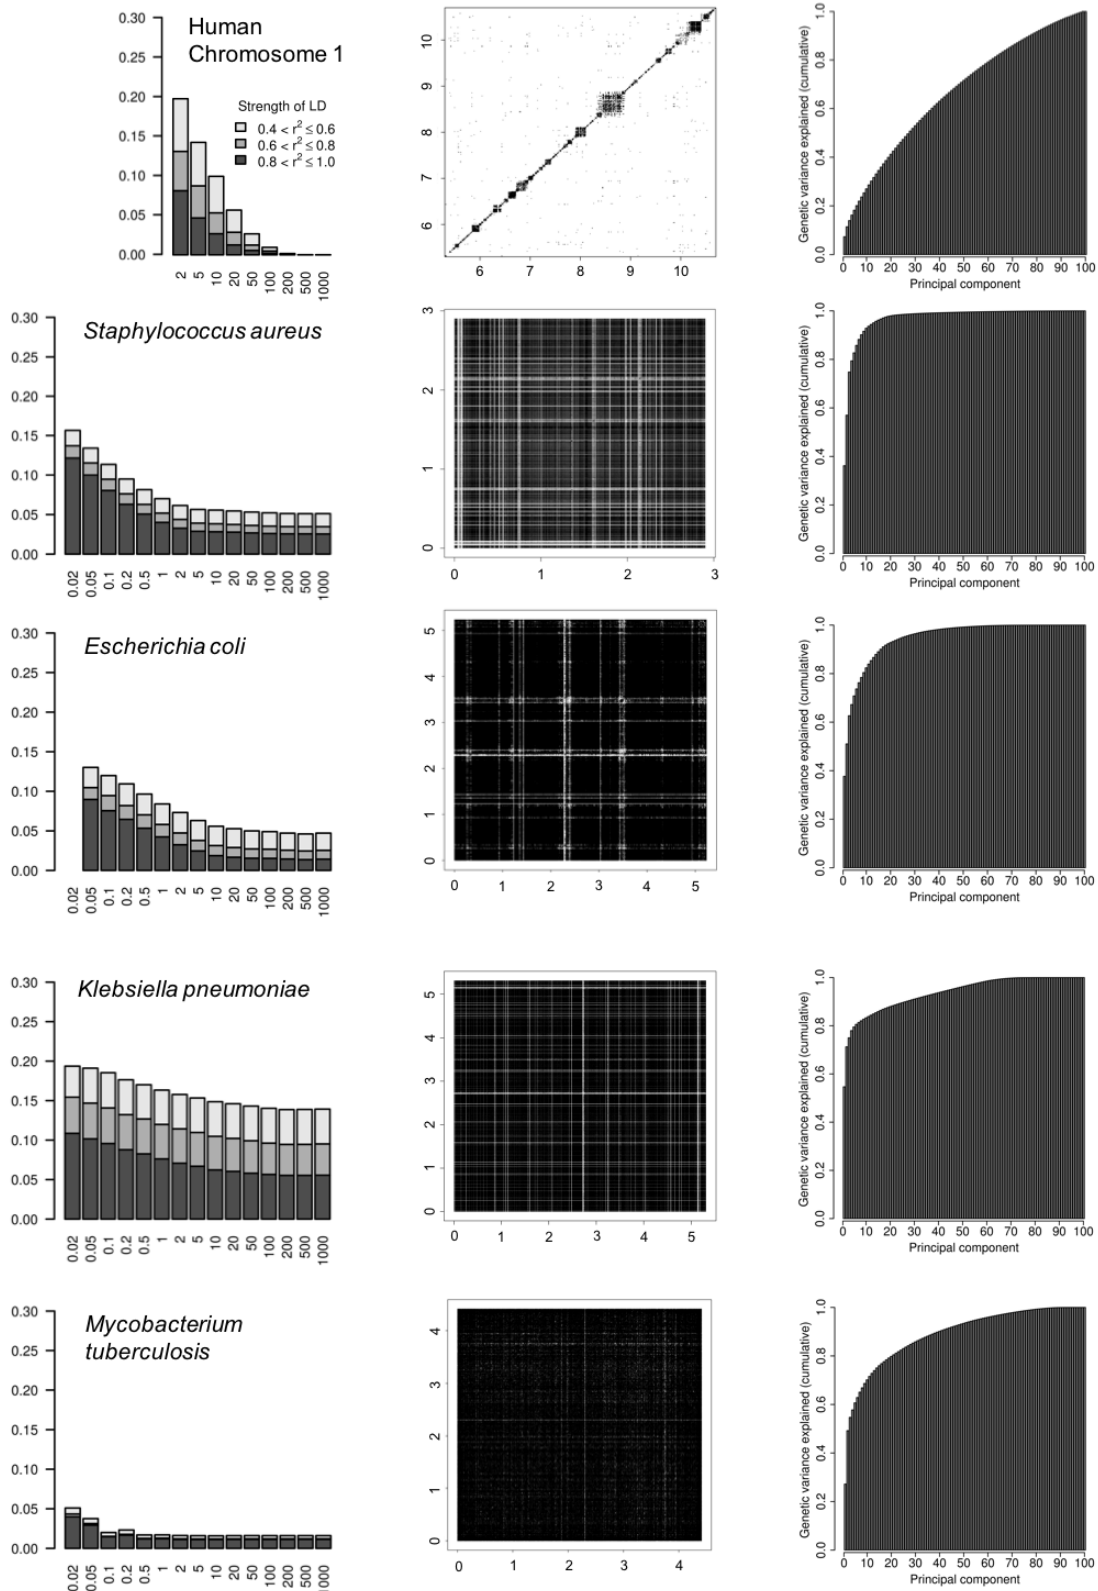

**Supplementary Figure 1.** Linkage disequilibrium and population structure in humans vs bacteria is strikingly different. Left panels: LD ( $r^2$ ) decays rapidly with physical distance (in kb) in bacteria, as in humans, but plateaus to residual levels resulting in genome-wide LD. Middle panels: Points show the position of sites (in Mb) in high LD ( $r^2 > 0.7$ ). In contrast to the block-like structure of LD in humans, in bacteria the genome comprises one large LD block because of strong population structure and limited homologous recombination. Right panels: the cumulative proportion of genetic variability explained by leading principal components.

a

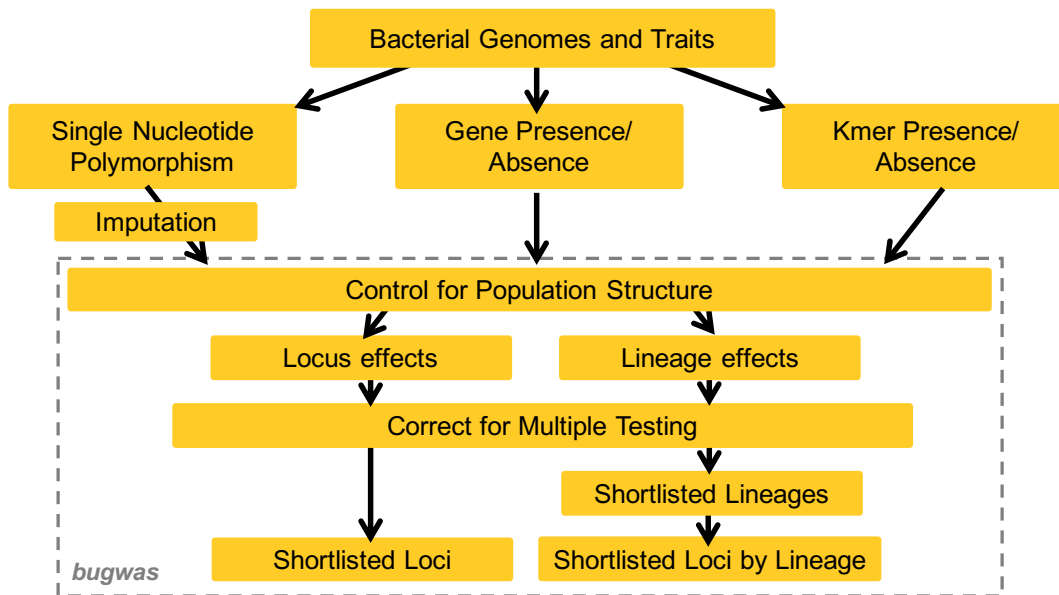

b

ATGGATATAGTTTCTTTATGGGACAAAACCCTACAATTAATAAAAGGTGACT

- ATGGATATAGTTTCTTTATGGGACAAAACCC (1) *Trim adaptors*
- TGGATATAGTTTCTTTATGGGACAAAACCCT (2) *Remove duplicates*
- GGATATAGTTTCTTTATGGGACAAAACCCTA (3) *Remove low quality reads*
- GATATAGTTTCTTTATGGGACAAAACCCTAC (4) *Count 31 base kmers (DSK)*
- TATAGTTTCTTTATGGGACAAAACCCTACAA (5) *Deduplicate kmers*
- ATAGTTTCTTTATGGGACAAAACCCTACAAT (6) *Annotate kmers by BLAST*
- TAGTTTCTTTATGGGACAAAACCCTACAATT (7) *Test each for association*
- AGTTTCTTTATGGGACAAAACCCTACAATTA

c

(1) *Assemble reads with Velvet*

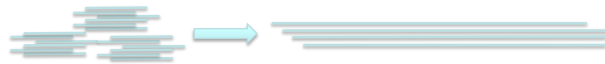

(2) *Annotate open reading frames on contigs (Prodigal)*

MDDAYYGLFYEDVKHV\* MLFTALSNLNSNAILPVRLDGV\*

(3) *Cluster proteins into groups of  $\geq 70\%$  similarity with Cd-hit*

MTAGFFLLNMSSIIDKKIYVLSKNNMVEKTSK\* \* < cluster represented by longest sequence  
 MTAGFFLLNMSSIIDKKIYVLSKNNMVEK\*  
 MTAGFFLLNMSSIIDKKIYVLSKNNNVEK\*  
 MTAGFFLLNMSSIIDKKIYVLSKNNMVEKTSK\*

(4) *BLAST against contigs to assess presence/absence of each gene*

>GENE1 0 1 1 1 1 1  
 >GENE2 0 0 0 0 0 1  
 >GENE3 1 0 1 0 0 1

(5) *Test each gene for association with phenotype*

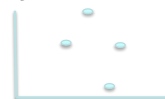

**Supplementary Figure 2.** (a) Overview of our approach. We identify significant loci and lineages, and the most significant loci within significant lineages. (b) Kmer analysis of hard-to-reach diversity. Some diversity (e.g. indels, repeats) is difficult to capture using standard variant calling tools. We directly analyse presence/absence of short haplotypes (*kmers*) to make sure we don't miss any associations. A kmer is a sliding window (in our case 31 bases long) of contiguous sequence. (c) Capturing the accessory genome. Differential presence or absence of genes or entire mobile elements is an important source of diversity in bacterial genomes. We test for associations with gene presence/absence by defining the accessory genome using Cd-hit and profiling each bug using BLAST.

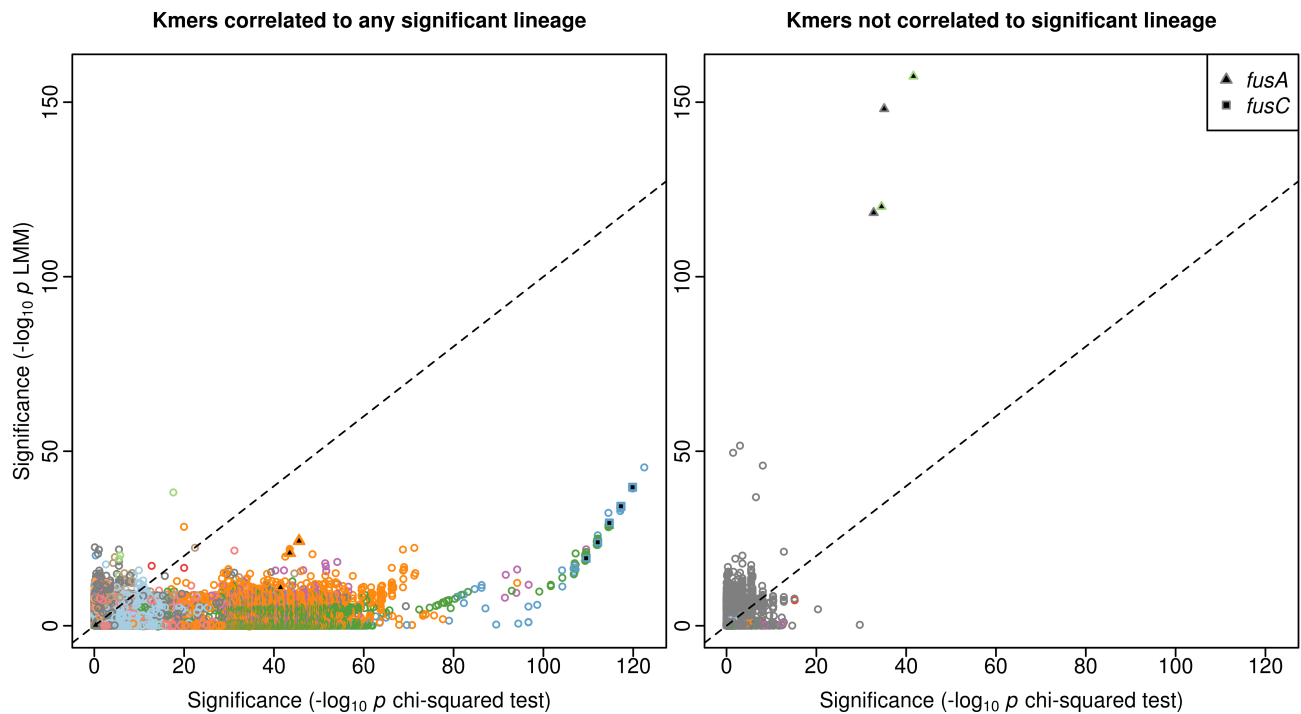

**Supplementary Figure 3.** Differential effect of controlling for population structure using LMM on significance of the association between fusidic acid resistance and kmers that are correlated vs. uncorrelated with any significant lineage in *S. aureus*. Kmers that are population-stratified by any lineage suffer greater loss of power when controlling for population structure. This can be visualized in the specific example of fusidic acid resistance by noting that kmers significantly associated with any lineage (left) suffered greater loss of significance than other kmers (right) after controlling for population structure using LMM (vertical axes) compared to before controlling for population structure (horizontal axes). The 200,000 most-significant kmers prior to control for population structure and a random 200,000 are plotted. Each kmer is colour-coded according to the PC to which it is most strongly correlated, grey if it is not most strongly correlated to one of the 20 most significant PCs. Left: kmers with absolute correlation  $> 0.25$  to any PC showing significant association to fusidic acid resistance. Right: kmers with no absolute correlation  $> 0.25$  to any PC showing significant association to fusidic acid resistance.

*Escherichia coli* ( $n = 241$ )

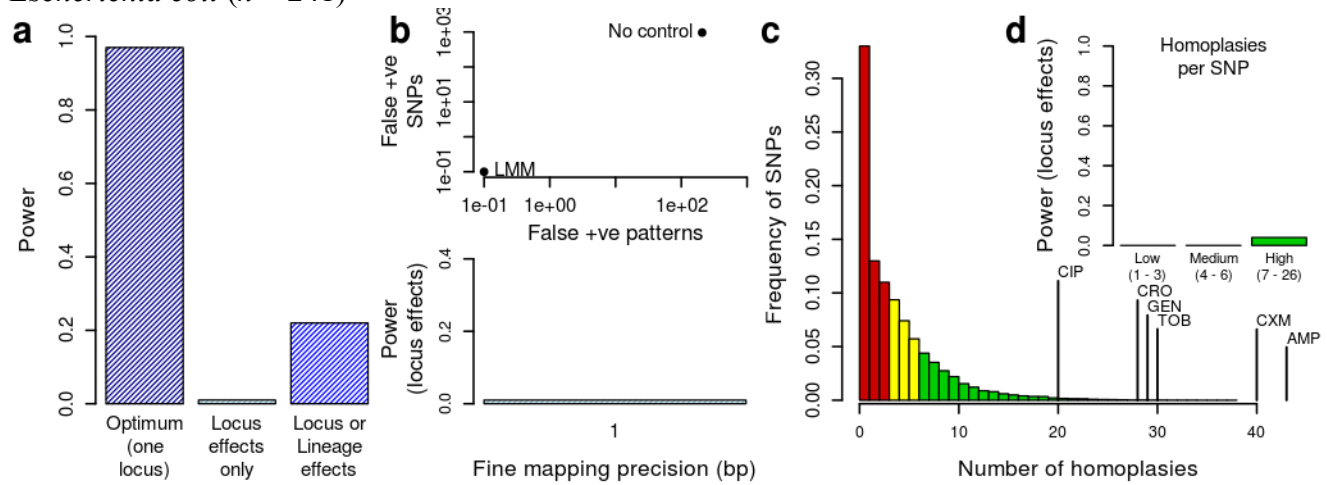

*Klebsiella pneumoniae* ( $n = 176$ )

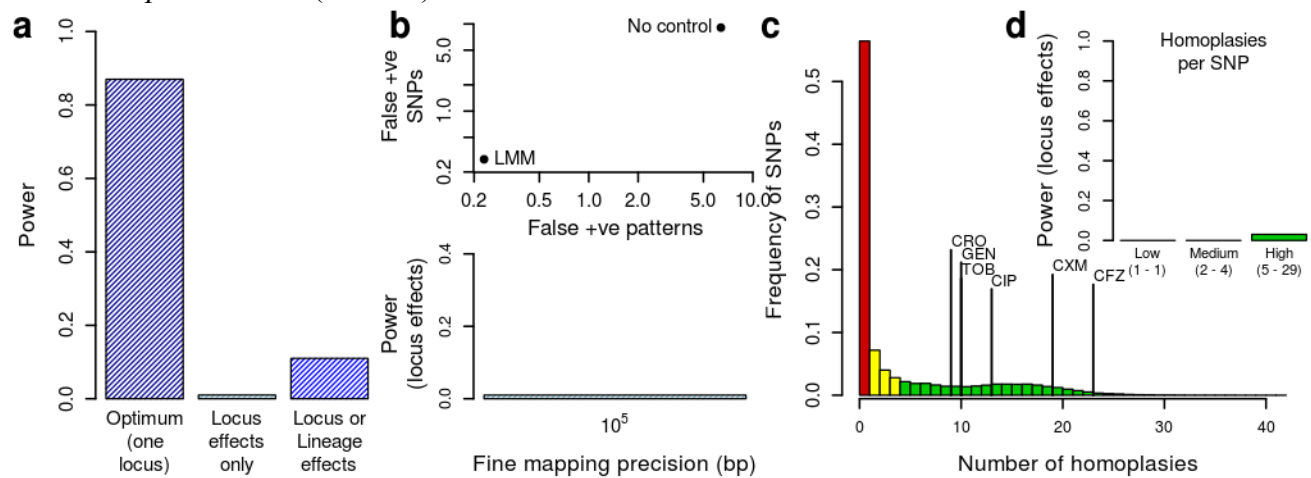

*Mycobacterium tuberculosis* ( $n = 1573$ )

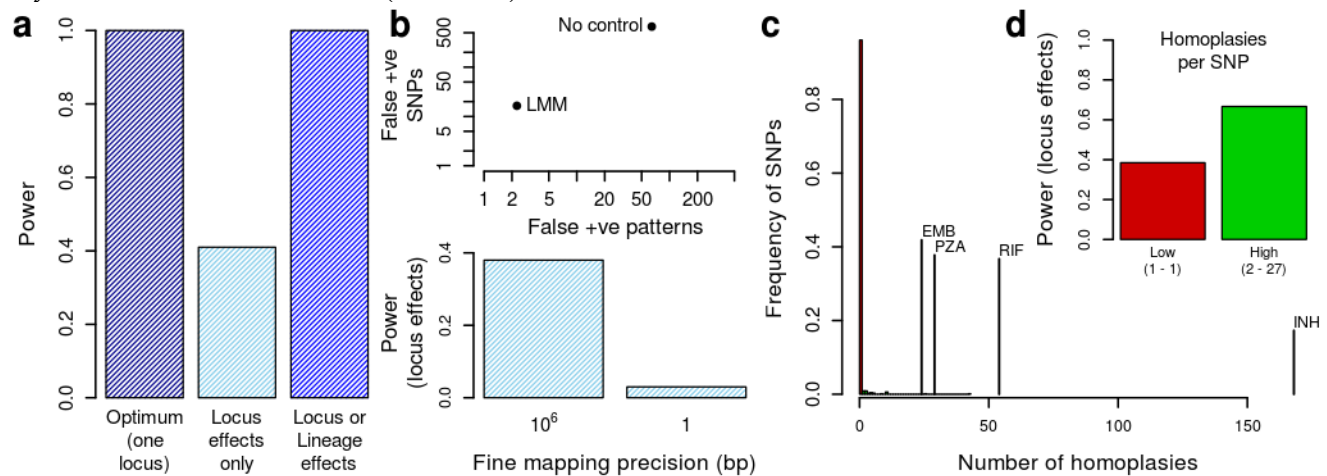

**Supplementary Figure 4.** Power, false positives, fine mapping and homoplasy in *E. coli*, *K.pneumoniae* and *M. tuberculosis*.

Simulation results. (a) Controlling for population structure and multiple testing lead to a drastic reduction in power to detect locus effects, compared to the theoretical optimum power for a single locus. The Wald test improves power several-fold by detecting lineage-specific effects. (b) Top: Mean numbers of false positive SNPs and patterns (i.e. unique distributions of SNP alleles among individuals) are drastically reduced by controlling population structure with LMM. Bottom: Fine mapping precision is very coarse owing to genome-wide LD. Interpreting lineage effects is useful when the locus-specific signal cannot be fine-mapped. (c) The number of times common SNPs (MAF>20%) and antibiotic resistance phenotypes have emerged on the phylogeny. (d) When homoplasy is high, power to detect locus effects is much improved, explaining the good power to map antibiotic resistance phenotypes. In the simulations, causal loci were selected at random from high frequency SNPs (MAF>20%) in the  $n$  isolates and phenotypes simulated per genome with case probabilities of 0.25 and 0.5 for the common and rare alleles respectively (odds ratio of 3). Genome wide significance (to detect locus effects) was based on a Bonferroni-corrected  $p$ -value threshold of  $\alpha$ , equal to 0.05 divided by the number of SNP patterns.

*Escherichia coli*

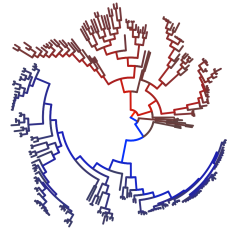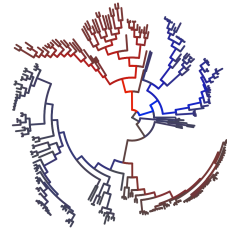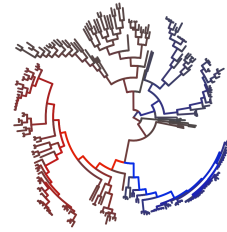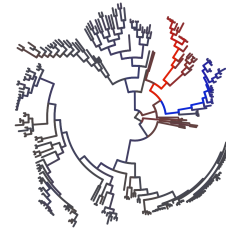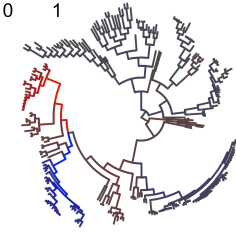

PC correlation  
-1 0 1

*Klebsiella pneumoniae*

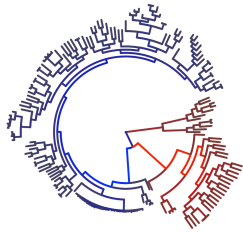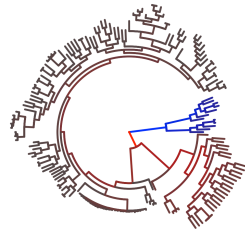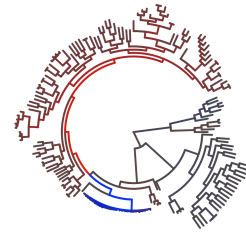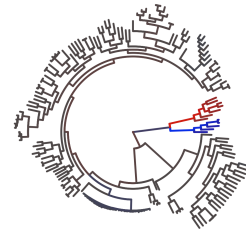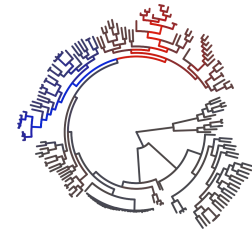

*Mycobacterium tuberculosis*

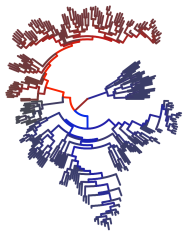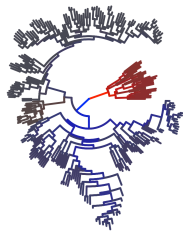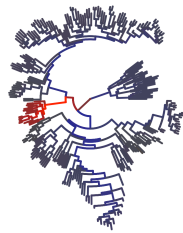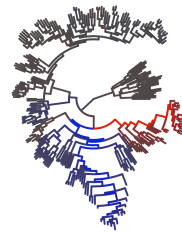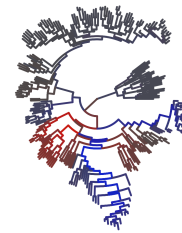

*Staphylococcus aureus*

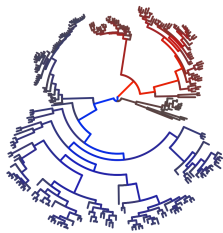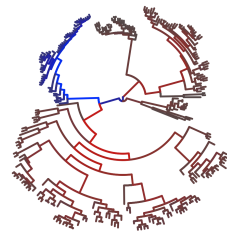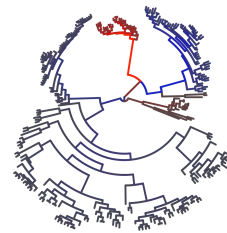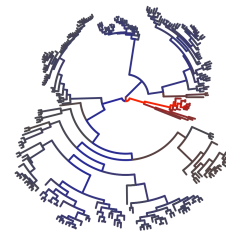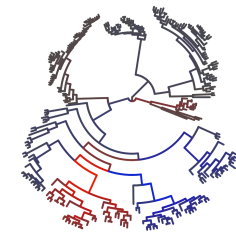

PC 1

PC 2

PC 3

PC 4

PC 5

**Supplementary Figure 5.** Leading principal components correspond to major lineages in bacterial genealogies. For each species, branches of the maximum likelihood phylogeny are coloured by their correlation with each of PCs 1-5. Positive vs. negative correlations are shown in red vs. blue, brighter colours indicating stronger correlation. A square root transform was applied to branch lengths to visualize fine-scale structure.

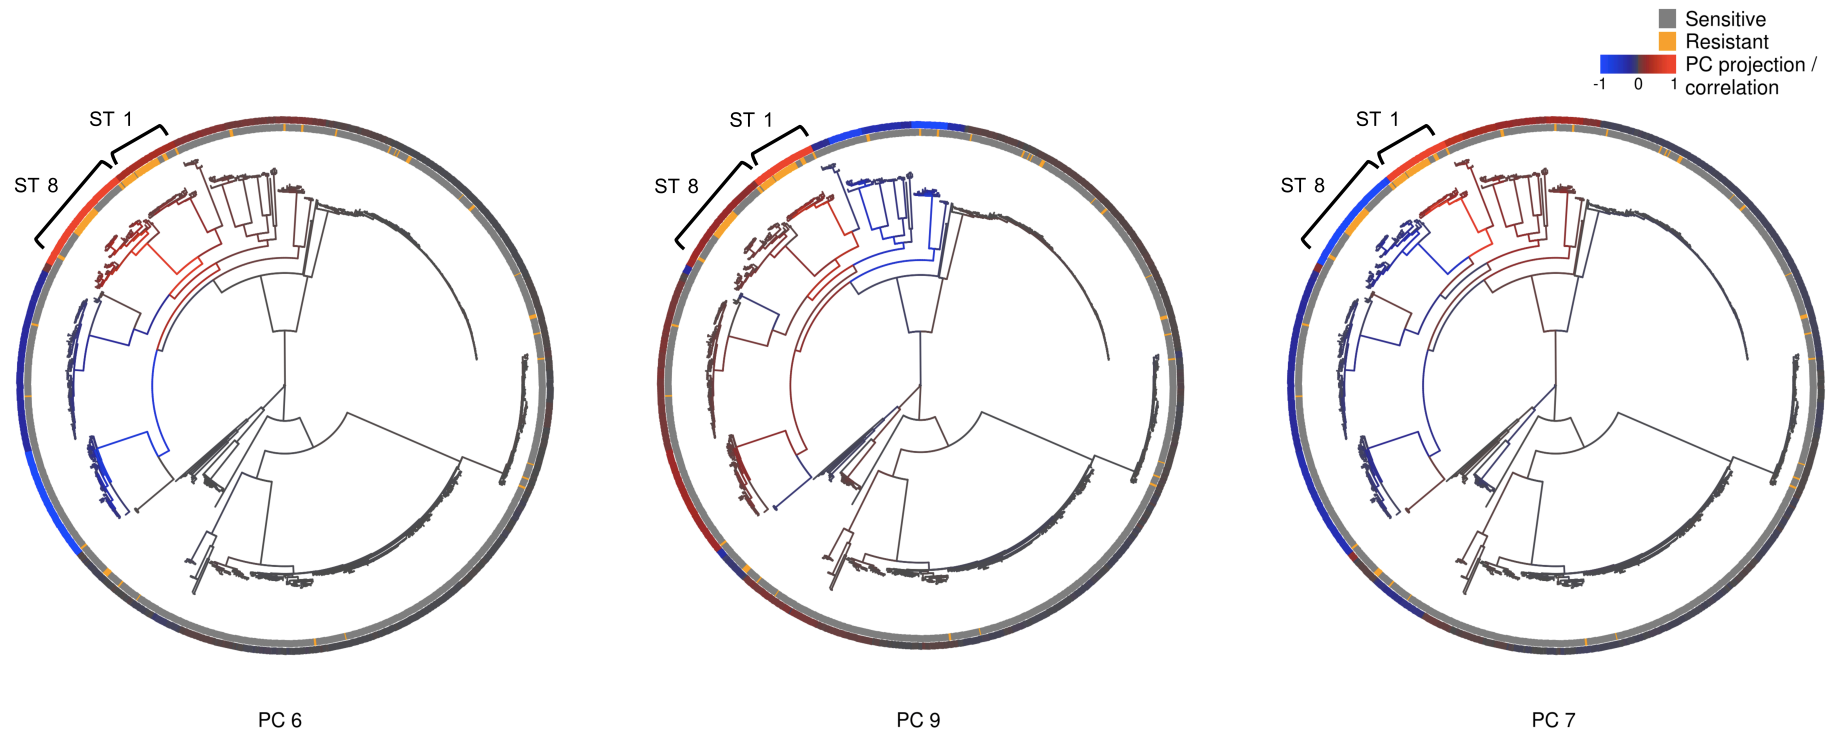

**Supplementary Figure 6.** The *S. aureus* phylogeny with the tips annotated by the fusidic acid resistance phenotype, orange for resistant and grey for sensitive. Branches of the tree are coloured according to their correlation with PC-6 (left), PC-9 (middle) and PC-7 (right). Positive correlations are coloured red and negative correlations blue, with brighter colouring indicating stronger correlation. Each PC appears to trace a path through the phylogeny, contrasting one lineage (red branches) with another (blue branches). The outer ring is annotated according to the projection of the individuals onto PC-6 (left), PC-9 (middle) and PC-7 (right), rescaled between -1 and 1 (from blue to red).

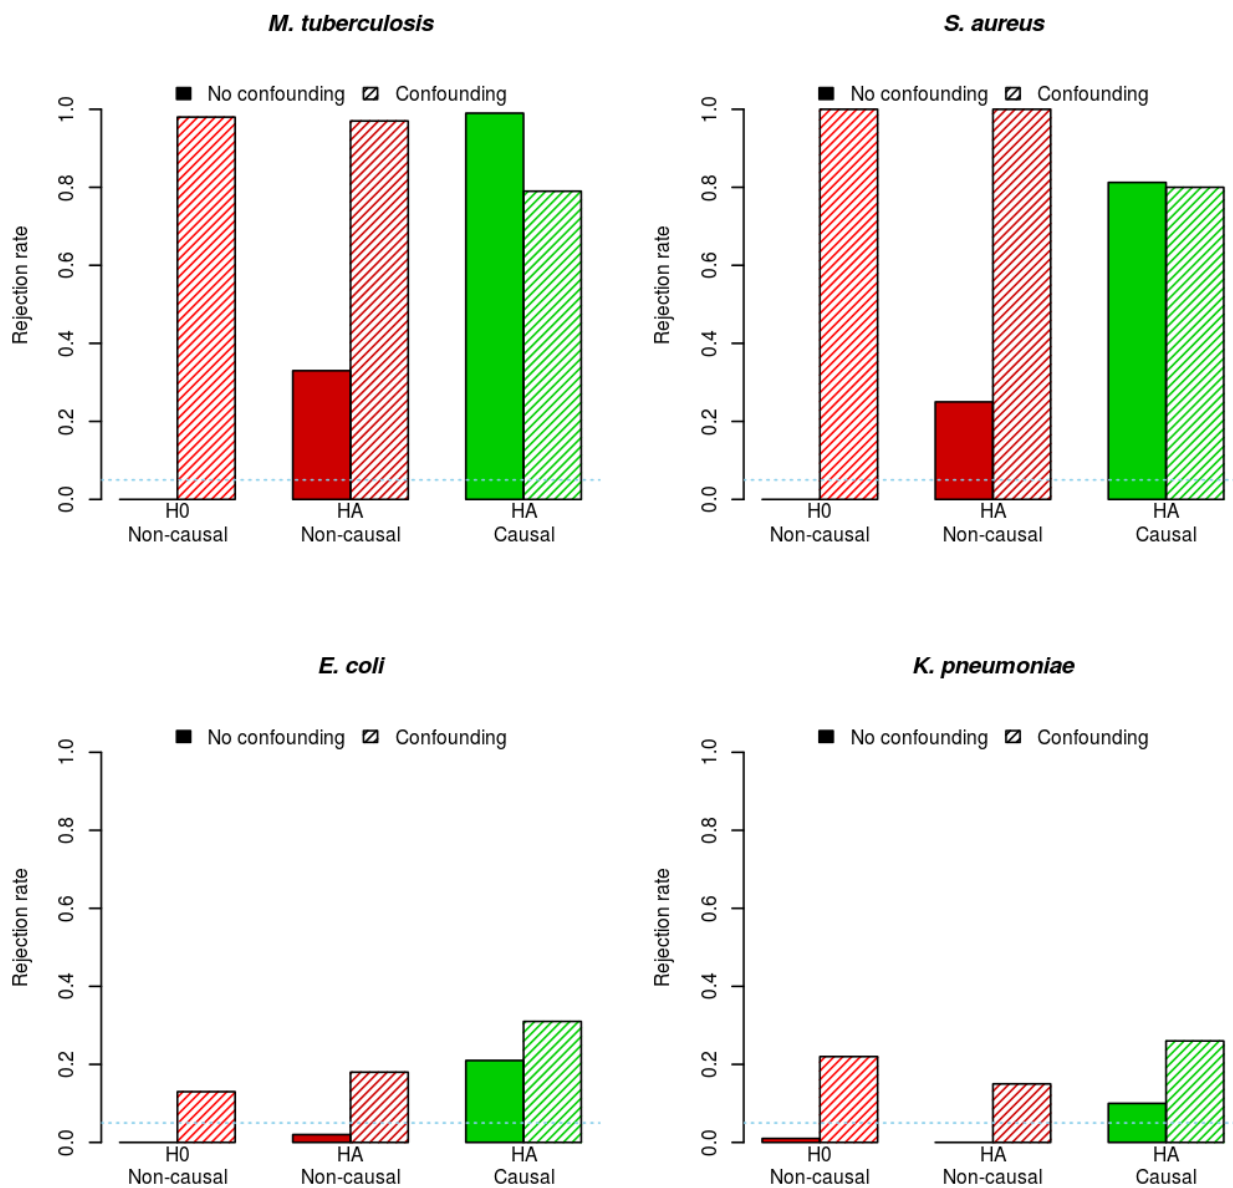

**Supplementary Figure 7.** Lineage effects are susceptible to confounding. For each of the four species, we conducted 100 simulations in the presence (HA) and absence (H0) of a causal SNP, in the presence and absence of confounding. The null hypothesis of no lineage effect was rejected when the PC-specific  $p$ -value from the Wald test exceeded the Bonferroni-corrected nominal rate of 0.05. A true rejection (green bars) was recorded for the PC most strongly correlated to the causal SNP (under HA); otherwise a false rejection (red bars) was recorded. In the absence of confounding (solid bars), the false rejection rate was well below the nominal rate under H0. Under HA, it was elevated in *M. tuberculosis* and *S. aureus* but it remained far below the true positive rate – this reflects the fact that multiple PCs are correlated to the causal SNP, therefore share some true signal. In the presence of confounding (hashed bars), the false rejection rate was inflated under both H0 and HA, demonstrating the susceptibility of lineage effects to capturing the effects of confounders in addition to genuine lineage-level differences. Baseline case probability was 0.25 and the rare allele at causal SNPs, chosen at random among those with frequency > 20% were assigned an odds ratio of 3. Confounding was simulated by generating phenotypic variability using the relatedness matrix, corresponding to mean heritability of 0.5 (*S. aureus*) 0.25 (*M. tuberculosis*) 0.1 (*E. coli*) and 0.1 (*K. pneumoniae*).



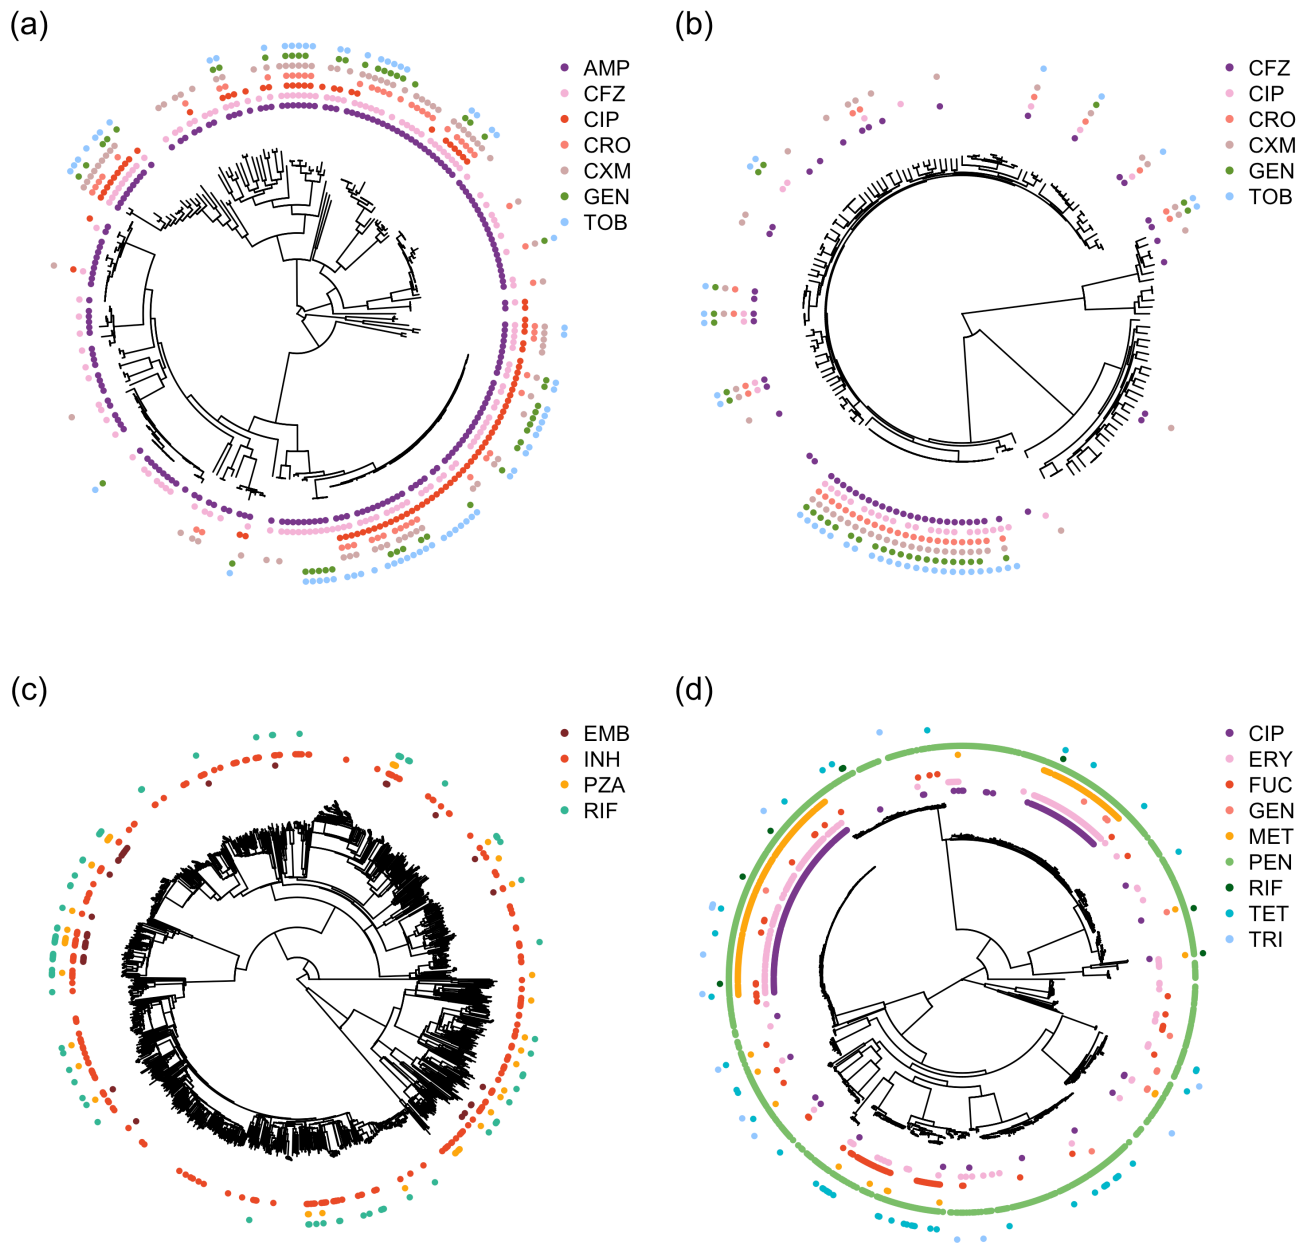

**Supplementary Figure 8.** Evolutionary relationships and distribution of antibiotic resistance in the four species: (a) *Escherichia coli* (n = 241), (b) *Klebsiella pneumoniae* (n = 176), (c) *Mycobacterium tuberculosis* (n = 1735) and (d) *Staphylococcus aureus* (n = 992). In each case the midpoint-rooted maximum likelihood clonal frame tree is shown.

AMP = Ampicillin, CFZ = Cefazolin, CIP = Ciprofloxacin, CRO = Ceftriaxone, CXM = Cefuroxime, GEN = Gentamicin, TOB = Tobramycin, EMB = Ethambutol, INH = Isoniazid, PZA = Pyrazinamide, RIF = Rifampicin, ERY = Erythromycin, FUC = Fusidic acid, GEN = Gentamicin, MET = Methicillin, PEN = Penicillin, RIF = Rifampicin, TET = Tetracycline, TRI = Trimethoprim.

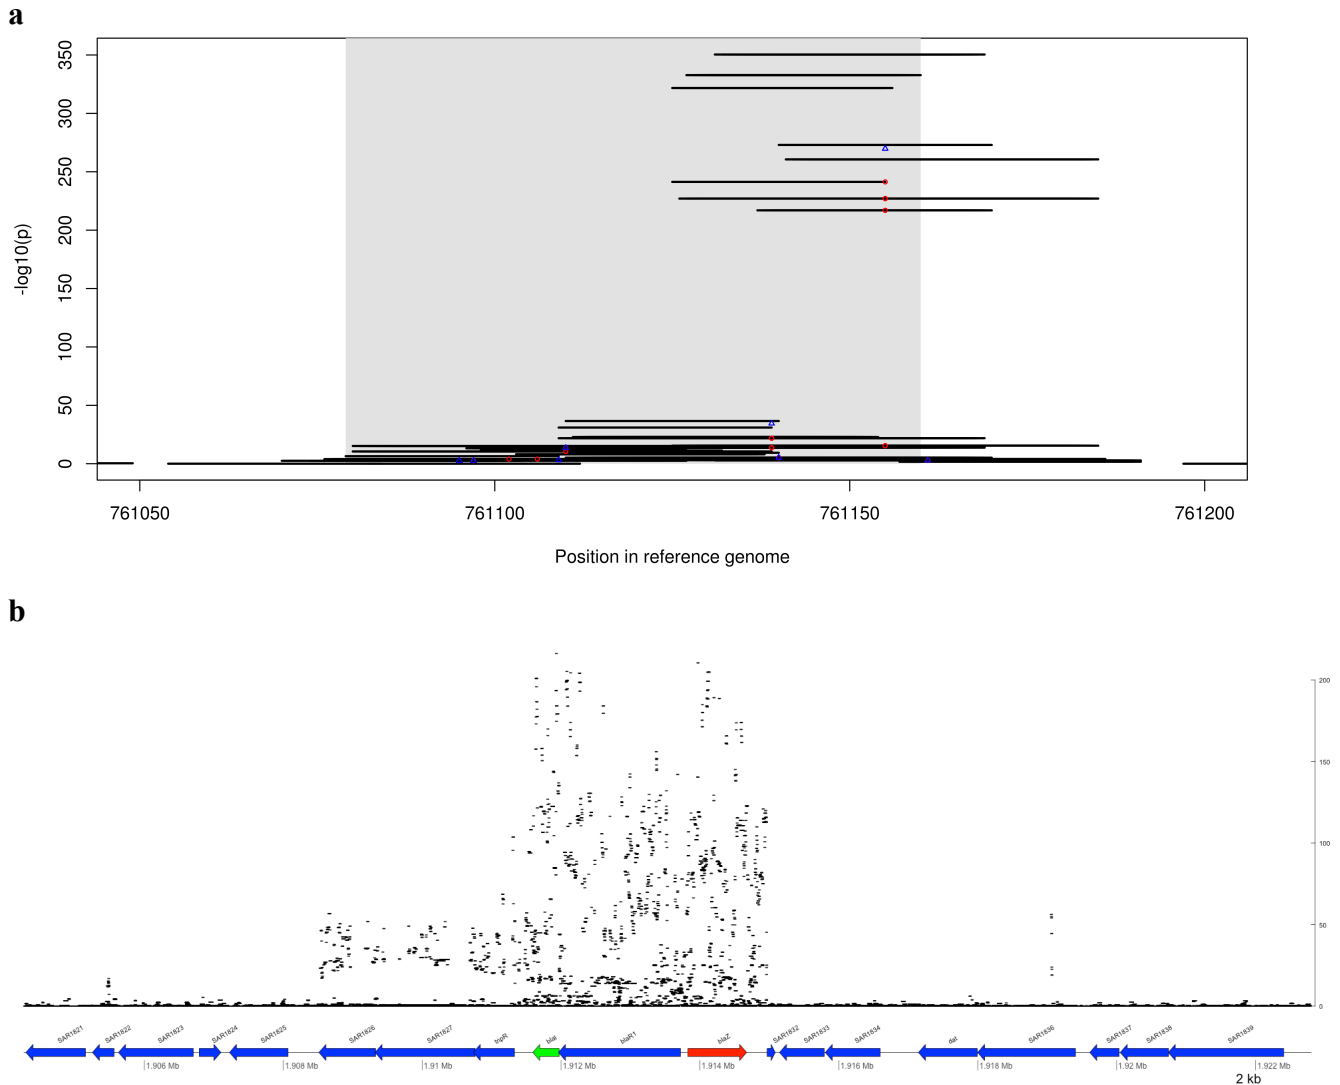

**Supplementary Figure 9. (a)** A close up of the *rpoB* gene from the *M. tuberculosis* rifampicin kmer GWAS after controlling for population structure. The shaded region represents the codon positions within *rpoB* where amino acid substitutions alter resistance. Kmers were plotted as black lines, with their significance of association with rifampicin resistance after controlling for population structure on the y-axis. Blue triangles illustrate non-synonymous, nonsense and read-through SNP results after controlling for population structure. Kmers were annotated by SNPs they contained, with red circles representing non-synonymous, nonsense or read-through SNPs within the shaded region. The most significant SNP was a non-synonymous SNP causal of resistance, and the most significant kmer coincided with this region. However, the kmer was more significant, indicating an increase in power by pooling over multiple variants. This is shown by the ‘wild-type’ kmer containing no SNPs, thus it was found to be protective. **(b)** The region containing the penicillin resistance-conferring *blaZ* gene showing the kmer results for penicillin resistance in *S. aureus* after controlling for population structure. The gene containing the most significant kmers (the *blaZ* repressor *blaI*) is in green and *blaZ* is in red. The mobile element-associated region of LD was detected along with the causal mechanism.

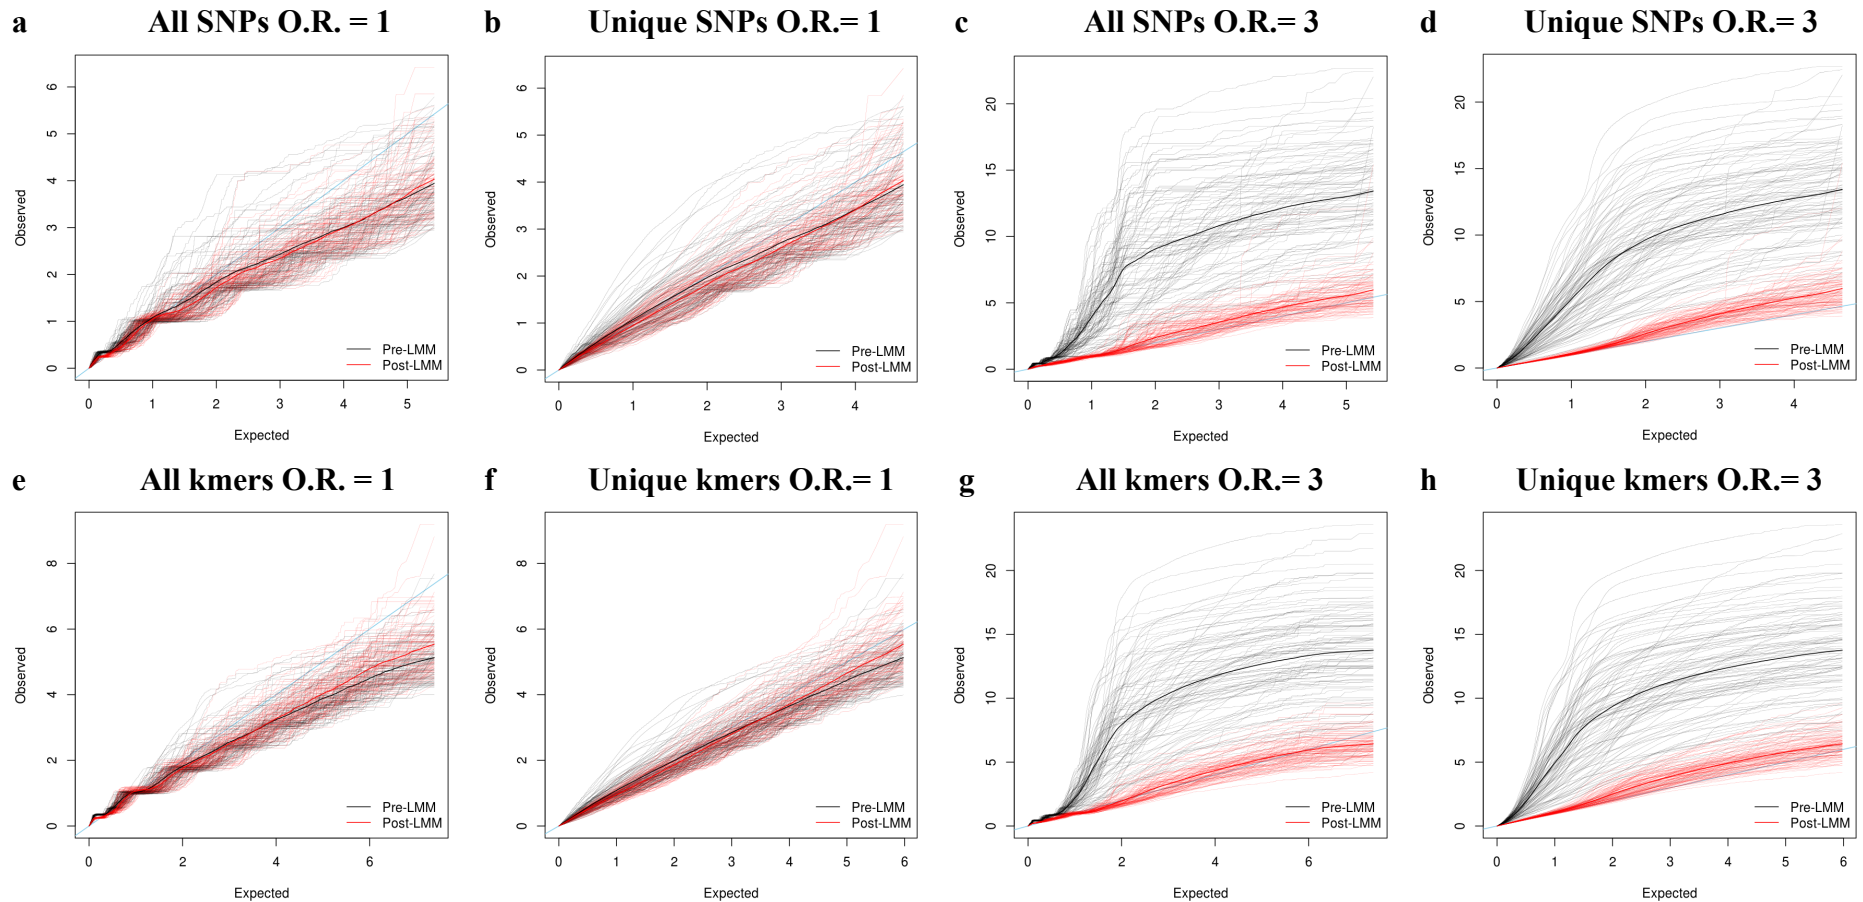

**Supplementary Figure 10.** Bonferroni correction for the number of unique SNP or kmer patterns is better calibrated than using the total number of SNPs or kmers. We conducted 100 simulations in *S. aureus* (results were similar for other species) in the absence of confounding in the absence (**O.R.=1**) and presence (**O.R.=3**) of a causal variant with minor allele frequency > 20%, baseline case probability of 0.25 and odds ratio 3. For each simulation, we obtained  $p$ -values for the locus effect of every variant using logistic regression (black lines) and LMM (red lines). The thick lines show the mean across simulations. For each simulation, the line shows a qq-plot of the expected versus the observed significance ( $-\log_{10} p$ -value), after ordering variants by significance. In (**a,e**) the distribution of observed  $p$ -values was substantially deflated relative to that expected (blue line), indicating they are conservative. However, strong population structure leads many SNPs to be indistinguishable phylogenetically. In (**b,d**) this removes most of the deflation, indicating that Bonferroni correction based on the number of unique patterns produces better-calibrated, less conservative  $p$ -values in the absence of a causal variant. Simulations in the presence of a causal variant (**c,d,g,h**) show that failure to control population structure in the logistic regression leads to massive inflation of significance, a problem that is largely alleviated by the LMM. However, in correcting for population structure, the LMM often loses the significance of the causal variant because it is population-stratified, emphasizing the desirability of recovering this signal through our test for lineage effects.

| Species                           | % Ns to impute at the site | Sites originally imputed by CFML |                             | Sites originally called   |                             | Allele frequency at the site | Sites originally imputed by CFML |                             | Sites originally called   |                             |
|-----------------------------------|----------------------------|----------------------------------|-----------------------------|---------------------------|-----------------------------|------------------------------|----------------------------------|-----------------------------|---------------------------|-----------------------------|
|                                   |                            | % Correct imputation CFML        | % Correct imputation Beagle | % Correct imputation CFML | % Correct imputation Beagle |                              | % Correct imputation CFML        | % Correct imputation Beagle | % Correct imputation CFML | % Correct imputation Beagle |
| <i>Escherichia coli</i>           |                            |                                  |                             |                           |                             |                              |                                  |                             |                           |                             |
|                                   | 0-10%                      | 97.6                             | 98.0                        | 96.5                      | 97.6                        | 0.00-0.01                    | 92.0                             | 89.3                        | 93.2                      | 91.9                        |
|                                   | 10-20%                     | 96.0                             | 96.5                        | 94.9                      | 95.6                        | 0.01-0.05                    | 90.6                             | 86.9                        | 90.9                      | 88.1                        |
|                                   | 20-30%                     | 94.8                             | 95.1                        | 94.0                      | 94.3                        | 0.05-0.10                    | 91.4                             | 90.5                        | 91.8                      | 90.5                        |
|                                   | 30-40%                     | 94.6                             | 94.7                        | 93.7                      | 93.9                        | 0.10-0.15                    | 92.6                             | 92.4                        | 91.9                      | 91.6                        |
|                                   | 40-50%                     | 92.3                             | 91.1                        | 91.9                      | 90.9                        | 0.15-0.20                    | 93.8                             | 93.5                        | 92.9                      | 92.8                        |
|                                   | 50-60%                     | 93.4                             | 92.8                        | 93.0                      | 92.1                        | 0.20-0.25                    | 93.0                             | 93.3                        | 91.9                      | 92.1                        |
|                                   | 60-70%                     | 92.3                             | 89.6                        | 91.7                      | 89.0                        | 0.25-0.30                    | 93.8                             | 94.5                        | 92.3                      | 93.1                        |
|                                   | 70-80%                     | 91.0                             | 89.0                        | 90.1                      | 87.7                        | 0.30-0.35                    | 94.9                             | 95.0                        | 93.3                      | 93.4                        |
|                                   | 80-90%                     | 88.2                             | 83.5                        | 87.1                      | 82.8                        | 0.35-0.40                    | 96.4                             | 96.3                        | 94.6                      | 94.8                        |
|                                   | 90-100%                    | 82.9                             | 74.3                        | 81.7                      | 73.4                        | 0.40-0.45                    | 98.0                             | 97.9                        | 96.5                      | 96.9                        |
|                                   |                            |                                  |                             |                           |                             | 0.45-0.50                    | 97.3                             | 97.7                        | 96.1                      | 97.0                        |
| <i>Klebsiella pneumoniae</i>      |                            |                                  |                             |                           |                             |                              |                                  |                             |                           |                             |
|                                   | 0-10%                      | 95.8                             | 93.7                        | 95.8                      | 94.3                        | 0.00-0.01                    | 90.1                             | 86.5                        | 92.1                      | 88.6                        |
|                                   | 10-20%                     | 92.9                             | 91.2                        | 92.0                      | 90.1                        | 0.01-0.05                    | 90.9                             | 88.5                        | 92.3                      | 89.8                        |
|                                   | 20-30%                     | 90.4                             | 88.4                        | 91.3                      | 89.2                        | 0.05-0.10                    | 91.8                             | 91.2                        | 92.3                      | 91.2                        |
|                                   | 30-40%                     | 94.8                             | 94.1                        | 95.6                      | 94.6                        | 0.10-0.15                    | 93.7                             | 93.5                        | 94.9                      | 94.3                        |
|                                   | 40-50%                     | 94.6                             | 94.4                        | 95.8                      | 95.1                        | 0.15-0.20                    | 93.1                             | 92.5                        | 94.3                      | 92.9                        |
|                                   | 50-60%                     | 95.6                             | 95.3                        | 96.6                      | 96.0                        | 0.20-0.25                    | 91.7                             | 91.1                        | 96.0                      | 94.5                        |
|                                   | 60-70%                     | 94.6                             | 93.8                        | 95.6                      | 94.3                        | 0.25-0.30                    | 84.6                             | 85.8                        | 84.5                      | 87.2                        |
|                                   | 70-80%                     | 92.8                             | 90.7                        | 94.0                      | 90.6                        | 0.30-0.35                    | 85.0                             | 85.0                        | 82.1                      | 85.7                        |
|                                   | 80-90%                     | 80.7                             | 78.1                        | 79.7                      | 76.1                        | 0.35-0.40                    | 85.4                             | 85.2                        | 82.2                      | 85.9                        |
|                                   | 90-100%                    | 82.5                             | 72.7                        | 83.9                      | 71.6                        | 0.40-0.45                    | 90.2                             | 90.5                        | 86.0                      | 89.3                        |
|                                   |                            |                                  |                             |                           |                             | 0.45-0.50                    | 94.2                             | 93.2                        | 88.4                      | 91.7                        |
| <i>Mycobacterium tuberculosis</i> |                            |                                  |                             |                           |                             |                              |                                  |                             |                           |                             |
|                                   | 0-10%                      | 99.8                             | 98.0                        | 99.8                      | 99.0                        | 0.00-0.01                    | 93.8                             | 86.4                        | 96.8                      | 94.9                        |
|                                   | 10-20%                     | 99.9                             | 98.7                        | 99.8                      | 99.0                        | 0.01-0.05                    | 98.4                             | 81.9                        | 98.3                      | 90.2                        |
|                                   | 20-30%                     | 99.7                             | 98.7                        | 99.8                      | 98.8                        | 0.05-0.10                    | 99.5                             | 91.8                        | 99.8                      | 93.8                        |
|                                   | 30-40%                     | 99.5                             | 97.8                        | 99.7                      | 98.3                        | 0.10-0.15                    | 98.4                             | 88.3                        | 99.6                      | 94.3                        |
|                                   | 40-50%                     | 99.9                             | 98.4                        | 99.7                      | 98.4                        | 0.15-0.20                    | 100                              | 97.1                        | 100.0                     | 96.7                        |
|                                   | 50-60%                     | 99.4                             | 93.6                        | 99.6                      | 98.4                        | 0.20-0.25                    | 100                              | 96.9                        | 99.7                      | 96.2                        |
|                                   | 60-70%                     | 95.7                             | 94.2                        | 99.0                      | 96.2                        | 0.25-0.30                    | 99.6                             | 93.5                        | 99.9                      | 96.3                        |
|                                   | 70-80%                     | 98.8                             | 92.3                        | 98.4                      | 95.3                        | 0.30-0.35                    | 100                              | 95.9                        | 100                       | 96.4                        |
|                                   | 80-90%                     | 98.4                             | 88.4                        | 97.8                      | 91.5                        | 0.35-0.40                    | 100                              | 97.2                        | 100.0                     | 96.0                        |
|                                   | 90-100%                    | 89.5                             | 72.0                        | 88.3                      | 78.1                        | 0.40-0.45                    | 100                              | 75                          | 100                       | 98.5                        |
|                                   |                            |                                  |                             |                           |                             | 0.45-0.50                    | NA                               | NA                          | NA                        | NA                          |
| <i>Staphylococcus aureus</i>      |                            |                                  |                             |                           |                             |                              |                                  |                             |                           |                             |
|                                   | 0-10%                      | 98.1                             | 97.7                        | 98.0                      | 97.9                        | 0.00-0.01                    | 84.3                             | 79.8                        | 92.5                      | 89.8                        |
|                                   | 10-20%                     | 97.0                             | 96.5                        | 97.7                      | 97.1                        | 0.01-0.05                    | 87.5                             | 80.7                        | 91.4                      | 85.9                        |
|                                   | 20-30%                     | 93.9                             | 92.8                        | 94.9                      | 94.4                        | 0.05-0.10                    | 88.4                             | 80.8                        | 92.7                      | 88.8                        |
|                                   | 30-40%                     | 89.2                             | 85.2                        | 91.7                      | 88.2                        | 0.10-0.15                    | 90.2                             | 86.4                        | 91.5                      | 87.8                        |
|                                   | 40-50%                     | 91.7                             | 87.2                        | 93.7                      | 89.6                        | 0.15-0.20                    | 91.8                             | 90.1                        | 92.9                      | 90.5                        |
|                                   | 50-60%                     | 87.5                             | 79.0                        | 90.7                      | 84.4                        | 0.20-0.25                    | 91.0                             | 89.1                        | 92.9                      | 90.8                        |
|                                   | 60-70%                     | 85.9                             | 77.5                        | 89.0                      | 82.3                        | 0.25-0.30                    | 93.9                             | 91.0                        | 94.3                      | 91.4                        |
|                                   | 70-80%                     | 88.7                             | 81.2                        | 91.1                      | 84.6                        | 0.30-0.35                    | 95.7                             | 93.5                        | 95.3                      | 93.6                        |
|                                   | 80-90%                     | 85.6                             | 79.3                        | 88.4                      | 82.9                        | 0.35-0.40                    | 95.9                             | 95.9                        | 95.2                      | 95.4                        |
|                                   | 90-100%                    | 73.8                             | 67.4                        | 77.5                      | 69.1                        | 0.40-0.45                    | 96.7                             | 96.8                        | 95.9                      | 96.2                        |
|                                   |                            |                                  |                             |                           |                             | 0.45-0.50                    | 97.3                             | 96.8                        | 95.0                      | 96.4                        |

Supplementary Table 1. Imputation accuracy for ClonalFrameML and Beagle per species. Results have been stratified into accuracy for sites which were originally imputed using ClonalFrameML, and accuracy for sites which were originally all called, so that the results are not biased by the original imputation by ClonalFrameML.

| Species                                              | Antimicrobial(s)                                            | Gene                              | Product                                        | SNP | Gene | Amino acid substitutions/region |
|------------------------------------------------------|-------------------------------------------------------------|-----------------------------------|------------------------------------------------|-----|------|---------------------------------|
| <b><i>Escherichia coli, Klebsiella pneumonia</i></b> |                                                             |                                   |                                                |     |      |                                 |
|                                                      | Penicillins: Ampicillin                                     | <i>bla<sub>TEM</sub></i>          | beta-lactamase                                 |     |      |                                 |
|                                                      |                                                             | <i>bla<sub>SHV</sub></i>          | beta-lactamase                                 |     |      |                                 |
|                                                      |                                                             | <i>bla<sub>CBL</sub></i>          | beta-lactamase                                 |     |      |                                 |
|                                                      |                                                             | <i>bla<sub>BRO</sub></i>          | beta-lactamase                                 |     |      |                                 |
|                                                      |                                                             | <i>bla<sub>HERA</sub></i>         | beta-lactamase                                 |     |      |                                 |
|                                                      |                                                             | <i>bla<sub>LEN</sub></i>          | beta-lactamase                                 |     |      |                                 |
|                                                      |                                                             | <i>bla<sub>M</sub></i>            | beta-lactamase                                 |     |      |                                 |
|                                                      |                                                             | <i>bla<sub>P</sub></i>            | beta-lactamase                                 |     |      |                                 |
|                                                      |                                                             | <i>bla<sub>ROB</sub></i>          | beta-lactamase                                 |     |      |                                 |
|                                                      |                                                             | <i>bla<sub>VHH</sub></i>          | beta-lactamase                                 |     |      |                                 |
|                                                      |                                                             | <i>bla<sub>VHW</sub></i>          | beta-lactamase                                 |     |      |                                 |
|                                                      |                                                             | <i>ampC promoter</i>              | mutations in <i>ampC</i> promoter              |     |      |                                 |
|                                                      |                                                             | <i>bla<sub>TEM</sub> promoter</i> | mutations in <i>bla<sub>TEM</sub></i> promoter |     |      |                                 |
|                                                      |                                                             | <i>bla<sub>TEM</sub></i>          | beta-lactamase                                 |     |      |                                 |
|                                                      | Cephalosporins:<br>Cefazolin,<br>Cefuroxime,<br>Ceftriaxone | <i>bla<sub>SHV</sub></i>          | beta-lactamase                                 |     |      |                                 |
|                                                      |                                                             | <i>bla<sub>CTX-M</sub></i>        | beta-lactamase                                 |     |      |                                 |
|                                                      |                                                             | <i>bla<sub>ACC</sub></i>          | beta-lactamase                                 |     |      |                                 |
|                                                      |                                                             | <i>bla<sub>ACI</sub></i>          | beta-lactamase                                 |     |      |                                 |
|                                                      |                                                             | <i>bla<sub>ACT</sub></i>          | beta-lactamase                                 |     |      |                                 |
|                                                      |                                                             | <i>bla<sub>AST</sub></i>          | beta-lactamase                                 |     |      |                                 |
|                                                      |                                                             | <i>bla<sub>BES</sub></i>          | beta-lactamase                                 |     |      |                                 |
|                                                      |                                                             | <i>bla<sub>BIC</sub></i>          | beta-lactamase                                 |     |      |                                 |
|                                                      |                                                             | <i>bla<sub>BIL</sub></i>          | beta-lactamase                                 |     |      |                                 |
|                                                      |                                                             | <i>bla<sub>CBL</sub></i>          | beta-lactamase                                 |     |      |                                 |
|                                                      |                                                             | <i>bla<sub>CEPA</sub></i>         | beta-lactamase                                 |     |      |                                 |
|                                                      |                                                             | <i>bla<sub>CGA</sub></i>          | beta-lactamase                                 |     |      |                                 |
|                                                      |                                                             | <i>bla<sub>CKO</sub></i>          | beta-lactamase                                 |     |      |                                 |
|                                                      |                                                             | <i>bla<sub>CIA</sub></i>          | beta-lactamase                                 |     |      |                                 |
|                                                      |                                                             | <i>bla<sub>CME</sub></i>          | beta-lactamase                                 |     |      |                                 |
|                                                      |                                                             | <i>bla<sub>CSP</sub></i>          | beta-lactamase                                 |     |      |                                 |
|                                                      |                                                             | <i>bla<sub>CMY</sub></i>          | beta-lactamase                                 |     |      |                                 |
|                                                      |                                                             | <i>bla<sub>CFE</sub></i>          | beta-lactamase                                 |     |      |                                 |
|                                                      |                                                             | <i>bla<sub>DES</sub></i>          | beta-lactamase                                 |     |      |                                 |
|                                                      |                                                             | <i>bla<sub>DHA</sub></i>          | beta-lactamase                                 |     |      |                                 |
|                                                      |                                                             | <i>bla<sub>ERP</sub></i>          | beta-lactamase                                 |     |      |                                 |
|                                                      |                                                             | <i>bla<sub>FONA</sub></i>         | beta-lactamase                                 |     |      |                                 |
|                                                      |                                                             | <i>bla<sub>FOX</sub></i>          | beta-lactamase                                 |     |      |                                 |
|                                                      |                                                             | <i>bla<sub>GES</sub></i>          | beta-lactamase                                 |     |      |                                 |
|                                                      |                                                             | <i>bla<sub>IBC</sub></i>          | beta-lactamase                                 |     |      |                                 |
|                                                      |                                                             | <i>bla<sub>LAP</sub></i>          | beta-lactamase                                 |     |      |                                 |
|                                                      |                                                             | <i>bla<sub>LAT</sub></i>          | beta-lactamase                                 |     |      |                                 |
|                                                      |                                                             | <i>bla<sub>LUT</sub></i>          | beta-lactamase                                 |     |      |                                 |
|                                                      | <i>bla<sub>MIR</sub></i>                                    | beta-lactamase                    |                                                |     |      |                                 |
|                                                      | <i>bla<sub>MOR</sub></i>                                    | beta-lactamase                    |                                                |     |      |                                 |
|                                                      | <i>bla<sub>MOX</sub></i>                                    | beta-lactamase                    |                                                |     |      |                                 |

|               |                            |                                               |                                                              |
|---------------|----------------------------|-----------------------------------------------|--------------------------------------------------------------|
|               | <i>bla<sub>OCH</sub></i>   | beta-lactamase                                |                                                              |
|               | <i>bla<sub>OKP</sub></i>   | beta-lactamase                                |                                                              |
|               | <i>bla<sub>ORN</sub></i>   | beta-lactamase                                |                                                              |
|               | <i>bla<sub>OXA</sub></i>   | beta-lactamase                                |                                                              |
|               | <i>bla<sub>OXY</sub></i>   | beta-lactamase                                |                                                              |
|               | <i>bla<sub>PER</sub></i>   | beta-lactamase                                |                                                              |
|               | <i>bla<sub>PLA</sub></i>   | beta-lactamase                                |                                                              |
|               | <i>bla<sub>PME</sub></i>   | beta-lactamase                                |                                                              |
|               | <i>bla<sub>RAHN</sub></i>  | beta-lactamase                                |                                                              |
|               | <i>bla<sub>SED</sub></i>   | beta-lactamase                                |                                                              |
|               | <i>bla<sub>SFO</sub></i>   | beta-lactamase                                |                                                              |
|               | <i>bla<sub>SPU</sub></i>   | beta-lactamase                                |                                                              |
|               | <i>bla<sub>SRT</sub></i>   | beta-lactamase                                |                                                              |
|               | <i>bla<sub>SST</sub></i>   | beta-lactamase                                |                                                              |
|               | <i>bla<sub>TER</sub></i>   | beta-lactamase                                |                                                              |
|               | <i>bla<sub>TLA</sub></i>   | beta-lactamase                                |                                                              |
|               | <i>bla<sub>TRU</sub></i>   | beta-lactamase                                |                                                              |
|               | <i>bla<sub>VEB</sub></i>   | beta-lactamase                                |                                                              |
|               | <i>bla<sub>ZEG</sub></i>   | beta-lactamase                                |                                                              |
|               | <i>cfxA</i>                | beta-lactamase precursor                      |                                                              |
|               | <i>mecA</i>                | low-affinity PBP2                             |                                                              |
| Ciprofloxacin | <i>gyrA</i>                | DNA topoisomerase (ATP-hydrolyzing) subunit A | quinolone-resistance determining region: amino acids 67-106  |
|               | <i>gyrB</i>                | DNA gyrase, subunit B                         | quinolone-resistance determining region: amino acids 426-464 |
|               | <i>parC</i>                | DNA topoisomerase IV subunit A                | quinolone-resistance determining region: amino acids 47-133  |
|               | <i>parE</i>                | DNA topoisomerase IV, subunit B               | quinolone-resistance determining region: amino acids 420-458 |
|               | <i>aac(6')-II</i>          | aminoglycoside N-acetyltransferase            |                                                              |
|               | <i>qnr</i>                 | quinolone resistance protein                  |                                                              |
|               | <i>qepA</i>                | quinolone efflux pump                         |                                                              |
|               | <i>oqxA</i>                | multidrug efflux membrane fusion protein      |                                                              |
|               | <i>oqxB</i>                | multidrug efflux membrane fusion protein      |                                                              |
| Gentamicin    | <i>aac(3)-I</i>            | aminoglycoside N-acetyltransferase            |                                                              |
|               | <i>aac(3)-II</i>           | aminoglycoside N-acetyltransferase            |                                                              |
|               | <i>aac(3)-III</i>          | aminoglycoside N-acetyltransferase            |                                                              |
|               | <i>aac(3)-IV</i>           | aminoglycoside N-acetyltransferase            |                                                              |
|               | <i>aac(3)-VI</i>           | aminoglycoside N-acetyltransferase            |                                                              |
|               | <i>aac(3)-VII</i>          | aminoglycoside N-acetyltransferase            |                                                              |
|               | <i>aac(6')-I</i>           | aminoglycoside N-acetyltransferase            |                                                              |
|               | <i>aac(6')-II</i>          | aminoglycoside N-acetyltransferase            |                                                              |
|               | <i>aac fusion variants</i> | aminoglycoside N-acetyltransferase            |                                                              |
|               | <i>ant(2'')-I</i>          | aminoglycoside O-nucleotidyltransferase       |                                                              |
|               | <i>aph(2'')-I</i>          | aminoglycoside O-phosphotransferase           |                                                              |
|               | <i>aph(2'')-II</i>         | aminoglycoside O-phosphotransferase           |                                                              |
|               | <i>aph(2'')-III</i>        | aminoglycoside O-phosphotransferase           |                                                              |
|               | <i>aph(2'')-IV</i>         | aminoglycoside O-phosphotransferase           |                                                              |
|               | <i>apmA</i>                | rRNA methylase                                |                                                              |
|               | <i>npmA</i>                | rRNA methylase                                |                                                              |
|               | <i>armA</i>                | rRNA methylase                                |                                                              |
|               | <i>rmt</i>                 | rRNA methylase                                |                                                              |
| Tobramycin    | <i>aac(3)-II</i>           | aminoglycoside N-acetyltransferase            |                                                              |
|               | <i>aac(3)-III</i>          | aminoglycoside N-acetyltransferase            |                                                              |

|                                          |                            |                                                                              |                                                                                                                                                                                                                                                                                                                                                                                                                                            |
|------------------------------------------|----------------------------|------------------------------------------------------------------------------|--------------------------------------------------------------------------------------------------------------------------------------------------------------------------------------------------------------------------------------------------------------------------------------------------------------------------------------------------------------------------------------------------------------------------------------------|
|                                          | <i>aac(3)-IV</i>           | aminoglycoside N-acetyltransferase                                           |                                                                                                                                                                                                                                                                                                                                                                                                                                            |
|                                          | <i>aac(2')-I</i>           | aminoglycoside N-acetyltransferase                                           |                                                                                                                                                                                                                                                                                                                                                                                                                                            |
|                                          | <i>aac(6')-I</i>           | aminoglycoside N-acetyltransferase                                           |                                                                                                                                                                                                                                                                                                                                                                                                                                            |
|                                          | <i>aac(6')-Ib-cr</i>       | aminoglycoside N-acetyltransferase                                           |                                                                                                                                                                                                                                                                                                                                                                                                                                            |
|                                          | <i>aac(6')-II</i>          | aminoglycoside N-acetyltransferase                                           |                                                                                                                                                                                                                                                                                                                                                                                                                                            |
|                                          | <i>aacA4</i>               | aminoglycoside N-acetyltransferase                                           |                                                                                                                                                                                                                                                                                                                                                                                                                                            |
|                                          | <i>aac fusion variants</i> | aminoglycoside N-acetyltransferase                                           |                                                                                                                                                                                                                                                                                                                                                                                                                                            |
|                                          | <i>ant(2'')-I</i>          | aminoglycoside O-nucleotidyltransferase                                      |                                                                                                                                                                                                                                                                                                                                                                                                                                            |
|                                          | <i>ant(4)-I</i>            | aminoglycoside O-nucleotidyltransferase                                      |                                                                                                                                                                                                                                                                                                                                                                                                                                            |
|                                          | <i>ant(4)-II</i>           | aminoglycoside O-nucleotidyltransferase                                      |                                                                                                                                                                                                                                                                                                                                                                                                                                            |
|                                          | <i>apmA</i>                | rRNA methylase                                                               |                                                                                                                                                                                                                                                                                                                                                                                                                                            |
|                                          | <i>npmA</i>                | rRNA methylase                                                               |                                                                                                                                                                                                                                                                                                                                                                                                                                            |
|                                          | <i>armA</i>                | rRNA methylase                                                               |                                                                                                                                                                                                                                                                                                                                                                                                                                            |
|                                          | <i>rmt</i>                 | rRNA methylase                                                               |                                                                                                                                                                                                                                                                                                                                                                                                                                            |
| <b><i>Staphylococcus aureus</i></b>      |                            |                                                                              |                                                                                                                                                                                                                                                                                                                                                                                                                                            |
| Penicillin                               | <i>blaZ</i>                | class A beta-lactamase                                                       |                                                                                                                                                                                                                                                                                                                                                                                                                                            |
| Methicillin                              | <i>mecA</i>                | low-affinity PBP2                                                            |                                                                                                                                                                                                                                                                                                                                                                                                                                            |
| Erythromycin                             | <i>msrA</i>                | erythromycin resistance protein                                              |                                                                                                                                                                                                                                                                                                                                                                                                                                            |
|                                          | <i>ermA</i>                | rRNA adenine N-6-methyltransferase                                           |                                                                                                                                                                                                                                                                                                                                                                                                                                            |
|                                          | <i>ermB</i>                | rRNA adenine N-6-methyltransferase                                           |                                                                                                                                                                                                                                                                                                                                                                                                                                            |
|                                          | <i>ermC</i>                | rRNA adenine N-6-methyltransferase                                           |                                                                                                                                                                                                                                                                                                                                                                                                                                            |
|                                          | <i>ermT</i>                | 23S rRNA methylase                                                           |                                                                                                                                                                                                                                                                                                                                                                                                                                            |
| Tetracycline                             | <i>tetK</i>                | MFS tetracycline efflux pump                                                 |                                                                                                                                                                                                                                                                                                                                                                                                                                            |
|                                          | <i>tetL</i>                | MFS tetracycline efflux pump                                                 |                                                                                                                                                                                                                                                                                                                                                                                                                                            |
|                                          | <i>tetM</i>                | ribosomal protection protein                                                 |                                                                                                                                                                                                                                                                                                                                                                                                                                            |
| Fusidic acid                             | <i>fusA</i>                | fusidic acid resistance protein; elongation factor G (EF-G)                  | A160V*, A376V, A655E, A655P*, A655V*, A67T*, A70V*, A71V*, B434N, C473S*, D189G*, D189V*, D373N*, D463G*, E233Q*, E444K, E444V*, E449K*, F441Y, F652S*, G451V, G452C, G452S, G556S, G617D, G664S, H438N, H457Q, H457Y, L430S*, L456F, L461K, L461S, M161I*, M453I, M651I, P114H, P404L, P404Q, P406L, P478S, Q115L, R464C, R464H, R464S, R659C, R659H, R659L, R659S, R76C*, S416F*, T385N, T387I*, T436I, T656K, V607I, V90A, V90I, Y654N* |
|                                          | <i>fusB</i>                | fusidic acid resistance protein; EF-G-binding protein                        |                                                                                                                                                                                                                                                                                                                                                                                                                                            |
|                                          | <i>fusC</i>                | fusidic acid resistance protein; EF-G-binding protein                        |                                                                                                                                                                                                                                                                                                                                                                                                                                            |
| Trimethoprim                             | <i>dfpA</i>                | trimethoprim resistance protein                                              |                                                                                                                                                                                                                                                                                                                                                                                                                                            |
|                                          | <i>dfpB</i>                | insensitive dihydrofolate reductase                                          | F99Y, F99S, F99I, H31N, L41F, H150R, L21V*, N60I*                                                                                                                                                                                                                                                                                                                                                                                          |
|                                          | <i>dfpG</i>                | insensitive dihydrofolate reductase                                          |                                                                                                                                                                                                                                                                                                                                                                                                                                            |
| Gentamicin                               | <i>aacA-aphD</i>           | 6'-aminoglycoside N-acetyltransferase/ 2''-aminoglycoside phosphotransferase |                                                                                                                                                                                                                                                                                                                                                                                                                                            |
| Ciprofloxacin                            | <i>gyrA</i>                | DNA topoisomerase (ATP-hydrolyzing) subunit A                                | S84L, E88K, G106D, S85P, E88G, E88L                                                                                                                                                                                                                                                                                                                                                                                                        |
|                                          | <i>griA</i>                | DNA topoisomerase IV subunit A                                               | S80F, S80Y, E84K, E84G, E84V, D432G, Y83N, A116E, I45M, A48T, D79V, V41G, S108N                                                                                                                                                                                                                                                                                                                                                            |
| Rifampicin                               | <i>griB</i>                | DNA topoisomerase IV subunit B                                               | R470D*, E422D*, P451S*, P585S*, D443E*, R444S                                                                                                                                                                                                                                                                                                                                                                                              |
|                                          | <i>rpoB</i>                | DNA-directed RNA polymerase subunit beta                                     | A473T*, A477D, A477T*, A477V, D471G*, D471Y, D550G, H481D, H481N, H481Y, I527F, I527L*, I527 M*, ins 475H, ins G475*, L466S*, M470T*, N474K*, Q456K, Q468K, Q468L, Q468R, Q565R*, R484H, S463P, S464P, S486L, S529L*                                                                                                                                                                                                                       |
| <b><i>Mycobacterium tuberculosis</i></b> |                            |                                                                              |                                                                                                                                                                                                                                                                                                                                                                                                                                            |
| Ethambutol                               | <i>embA</i>                | arabinoxyltransferase A                                                      | S49R, M153T                                                                                                                                                                                                                                                                                                                                                                                                                                |
|                                          | <i>embB</i>                | arabinoxyltransferase B                                                      | *306*, G406D, G406S, Q1002R, Q497R, T506N, W332R, E378A, K561R, S565G                                                                                                                                                                                                                                                                                                                                                                      |

|              |              |                                          |                                                                                                                                                                                                                                                                                                                                                                                                 |
|--------------|--------------|------------------------------------------|-------------------------------------------------------------------------------------------------------------------------------------------------------------------------------------------------------------------------------------------------------------------------------------------------------------------------------------------------------------------------------------------------|
| Isoniazid    | <i>embC</i>  | arabinoxyltransferase C                  | T270I, V981L, R738Q                                                                                                                                                                                                                                                                                                                                                                             |
|              | <i>ahpC</i>  | alkyl hydroperoxide reductase subunit    | C-39T, G-46A, G-88A                                                                                                                                                                                                                                                                                                                                                                             |
|              | <i>fabG1</i> | 3-oxoacyl-ACP reductase                  | *-15*, *-16*, *-8*                                                                                                                                                                                                                                                                                                                                                                              |
| Pyrazinamide | <i>katG</i>  | catalase-peroxidase                      | G279D, T180K, T302R, V473F, Y300C, R463L                                                                                                                                                                                                                                                                                                                                                        |
|              | <i>pncA</i>  | pyrazinamidase/nicotinamidase            | A11G, A102V, A134V, A146E, A161P, A171E, A46V, C138R, C138Y, C14R, C72R, D12A, D63G, D8G, G162D, G17D, G78C, G97D, G97S, H137R, H51P, H57D, H57Y, H71R, H82R, K96N, K96T, L116R, L159P, L172E, L172P, L19P, L27P, L35R, L4S, L85P, P54T, Q10P, Q141P, R121P, R140S, S104R, S185T, S66P, S67P, T-12C, T114P, T142K, T160P, T76P, V125G, V128G, V130G, V139L, V155G, V21G, W68C, W68G, W68R, Y34S |
| Rifampicin   | <i>rpoB</i>  | DNA-directed RNA polymerase subunit beta | *425*, *426*, *427*, *428*, *429*, *430*, *431*, *432*, *433*, *434*, *435*, *436*, *437*, *438*, *439*, *440*, *441*, *442*, *443*, *444*, *445*, *446*, *447*, *448*, *449*, *450*, *451*, *452*                                                                                                                                                                                              |

---

Supplementary Table 2. Summary of known antimicrobial resistance-conferring mechanisms. Compiled from Stoesser, N. *et al. J. Antimicrob. Chemother.* 68, 2234-2244 (2013), Gordon, N.C. *et al. J. Clin. Microbiol.* 52, 1182-1191 (2014) and Walker, T.M. *et al. Lancet Infect. Dis.* 15, 1193-1202 (2015).



| Drug | Gene                        | Study      | Variant                                               | Genome position (in reference genome) or BLAST accession |                          | Alleles | Type | Ctrl 1 | Ctrl 2 | Ctrl 3 | Case 1 | Case 2 | Case 3 | Odds ratio      | -log <sub>10</sub> (p) | Rank   | -log <sub>10</sub> (p) LMM | Rank LMM |
|------|-----------------------------|------------|-------------------------------------------------------|----------------------------------------------------------|--------------------------|---------|------|--------|--------|--------|--------|--------|--------|-----------------|------------------------|--------|----------------------------|----------|
|      |                             |            |                                                       | Pre-LMM                                                  | LMM                      |         |      |        |        |        |        |        |        |                 |                        |        |                            |          |
|      |                             |            |                                                       | AMP                                                      | <i>β-lactamase genes</i> |         |      |        |        |        |        |        |        |                 |                        |        |                            |          |
|      |                             | Kmer       | <i>bla</i> <sub>TEM-208</sub>                         | NC_017654.1 (1455 - 1485)                                |                          |         |      | 52     | 0      | -      | 53     | 136    | -      | Inf             | 23.6                   | 6      | 19.7                       | 6        |
|      | <i>Tn3-like transposase</i> | Kmer       | Linked to <i>bla</i> <sub>OXA-181</sub>               | KP400525.1 (51445-51475)                                 |                          |         |      | 50     | 2      | -      | 43     | 146    | -      | 84.9            | 25.9                   | 1      | 21.2                       | 1        |
| CIP  | <i>gyrA</i>                 | SNP / gene | D87N, D87W                                            | 2626015                                                  |                          | C, T, A | NS   | 147    | 2      | 1      | 5      | 86     | 0      | 1264.2, 0, 0    | 55.7                   | 2      | 18.5                       | 2        |
|      |                             | Kmer       | -                                                     | 2626026 - 2626056                                        |                          | -       | -    | 136    | 14     | -      | 1      | 90     | -      | 874.3           | 41.5                   | 45     | 43.4                       | 1        |
|      | <i>gyrB</i>                 | SNP / gene |                                                       | 4380590                                                  |                          | A, C, G | S    | 107    | 35     | 8      | 7      | 39     | 45     | 17.0, 86.0, 5.0 | 26.0                   | 43     | 21.4                       | 8        |
|      |                             | Kmer       |                                                       |                                                          |                          |         |      |        |        |        |        |        |        |                 |                        |        |                            |          |
|      | <i>parC</i>                 | SNP / gene | S80I                                                  | 3595065                                                  |                          | G, A    | NS   | 136    | 14     | -      | 1      | 90     | -      | 874.3           | 59.6                   | 1      | 55.8                       | 1        |
|      |                             | Kmer       |                                                       | 3595065 - 3595095                                        |                          |         |      | 4      | 146    | -      | 86     | 5      |        | 0.00159         | 45.6                   | 1      | 38.7                       | 28       |
|      | <i>parE</i>                 | SNP / gene | I529L                                                 | 3610603                                                  |                          | T, G    | NS   | 142    | 8      | -      | 46     | 45     | -      | 17.4            | 15.2                   | 6626   | 14.8                       | 156      |
|      |                             | Kmer       |                                                       | NC_013361.1 (627842 - 627812)                            |                          |         |      |        |        |        |        |        |        |                 |                        |        |                            |          |
| CFZ  | <i>β-lactamase genes</i>    | SNP / gene | <i>bla</i> <sub>CTX-M-15</sub>                        | U5SQ39                                                   |                          |         |      | 102    | 0      | -      | 96     | 43     | -      | Inf             | 12.7                   | 2      | 6                          | 3        |
|      |                             | Kmer       | <i>bla</i> <sub>CTX-M-15</sub>                        | DQ335219.1 (405 - 435)                                   |                          |         |      | 102    | 0      | -      | 107    | 32     | -      | Inf             | 6.71                   | 121710 | 3.99                       | 3690     |
|      | <i>nmpC</i>                 | SNP / gene |                                                       | P21420                                                   |                          |         |      | 15     | 87     | -      | 91     | 48     | -      | 0.09            | 15.4                   | 1      | 12.4                       | 1        |
|      |                             | Kmer       | <i>nmpC</i>                                           | 1985557 – 1985587                                        |                          |         |      | 16     | 86     | -      | 91     | 48     | -      | 0.1             | 13.8                   | 1      | 9.6                        | 1        |
| CXM  | <i>β-lactamase genes</i>    | SNP / gene | <i>bla</i> <sub>CTX-M-14</sub>                        | U5SQ39                                                   |                          |         |      | 159    | 1      | -      | 39     | 42     | -      | 171.2           | 23.2                   | 1      | 18.99                      | 1        |
|      |                             | Kmer       | <i>bla</i> <sub>CTX-M-15</sub>                        | KP268826.1 (7 - 37)                                      |                          |         |      | 160    | 0      | -      | 50     | 31     | -      | Inf             | 16.3                   | 1598   | 15.4                       | 470      |
|      | <i>Intergenic</i>           | Kmer       | Linked to <i>bla</i> <sub>CMY-2</sub> (31177 - 32322) | LC019731.1 (31015 - 31045)                               |                          |         |      | 160    | 0      | -      | 38     | 43     | -      | Inf             | 25.6                   | 1      | 20.0                       | 1        |

|     |                          |            |                                                                    |                                             |     |   |   |    |    |   |       |      |      |      |     |
|-----|--------------------------|------------|--------------------------------------------------------------------|---------------------------------------------|-----|---|---|----|----|---|-------|------|------|------|-----|
| CRO | $\beta$ -lactamase genes | SNP / gene | <i>bla<sub>CTX-M-15</sub></i>                                      | <a href="#">NC_022648.1</a>                 | 185 | 1 | - | 13 | 42 | - | 597.7 | 34.5 | 1    | 48.2 | 1   |
|     |                          | Kmer       | <i>bla<sub>CTX-M-15</sub></i>                                      | KP268826.1 (7 - 37)                         | 186 | 0 | - | 24 | 31 | - | Inf   | 27.3 | 1403 | 34.9 | 470 |
|     | tnpA – ISECP1            | Kmer       | Linked to <i>bla<sub>CTX-M-132</sub></i> (8362 - 9237; complement) | KM207012.2 (9298 – 9328)                    | 186 | 0 | - | 12 | 43 | - | Inf   | 39.7 | 1    | 56.4 | 1   |
| GEN | aac                      | SNP / gene | <i>aac(3)-II</i>                                                   | <a href="#">ESD46483.1</a>                  | 192 | 1 | - | 9  | 39 | - | 832.0 | 35.5 | 1    | 68.4 | 1   |
|     |                          | Kmer       | <i>aac(3)-II</i>                                                   | CP008735.1(7913-7943) CP008735.1(7913-7943) | 193 | 0 | - | 9  | 39 | - | Inf   | 41.9 | 1    | 74.0 | 1   |
| TOB | aac                      | SNP / gene | <i>aac(3)-II</i>                                                   | <a href="#">ESD46483.1</a>                  | 174 | 0 | - | 27 | 40 | - | Inf   | 28.6 | 1    | 30.5 | 1   |
|     |                          | Kmer       | <i>aac(3)-II</i>                                                   | KJ850481(134-164) KJ850481(134-164)         | 174 | 0 | - | 27 | 40 | - | Inf   | 28.2 | 1    | 30.5 | 1   |

Supplementary Table 3a. *Escherichia coli* results. AMP = Ampicillin, CFZ = Cefazolin, CIP = Ciprofloxacin, CRO = Ceftriaxone, CXM = Cefuroxime, GEN = Gentamicin, TOB = Tobramycin. Case = phenotypically resistant, control = phenotypically sensitive, aac = Aminoglycoside N-acetyltransferase genes, ant = Aminoglycoside N-acetyltransferase genes, aph = Aminoglycoside O-phosphotransferase genes. Causal gene names are coloured according to their resistance causing mechanism, red if it's presence determines resistance, blue if substitutions within the gene causes resistance.

| Drug | Gene                     | Study      | Variant                                    | Genome position (in reference genome)<br>or BLAST accession |     | Alleles | Type | Ctrl<br>1 | Ctrl<br>2 | Ctrl<br>3 | Case<br>1 | Case<br>2 | Case<br>3 | Odds<br>ratio | -<br>log <sub>10</sub> (p<br>) | Rank | -log <sub>10</sub> (p)<br>LMM | Rank<br>LMM |
|------|--------------------------|------------|--------------------------------------------|-------------------------------------------------------------|-----|---------|------|-----------|-----------|-----------|-----------|-----------|-----------|---------------|--------------------------------|------|-------------------------------|-------------|
|      |                          |            |                                            | Pre-LMM                                                     | LMM |         |      |           |           |           |           |           |           |               |                                |      |                               |             |
| CFZ  | <i>β-lactamase genes</i> | SNP / gene | <i>bla<sub>CTX-M-15</sub></i>              | A0A075VKM9                                                  |     |         |      | 122       | 1         | -         | 20        | 33        | -         | 201.3         | 20.8                           | 1    | 15.2                          | 2           |
|      |                          | Kmer       | <i>bla<sub>CTX-M-15</sub></i>              | DQ335219.1 (110-140)                                        |     |         |      | 122       | 1         | -         | 20        | 33        | -         | 201.3         | 20.6                           | 762  | 15.2                          | 837         |
|      | <i>HP from ISEcp1</i>    | SNP / gene |                                            |                                                             |     |         |      | 122       | 1         | -         | 20        | 33        | -         | 201.3         | 20.8                           | 1    | 15.2                          | 2           |
|      | protein WbuC             | SNP / gene |                                            | AIG86706.1                                                  |     |         |      | 122       | 1         | -         | 20        | 33        | -         | 201.3         | 20.8                           | 1    | 15.2                          | 1           |
|      | <i>ISEcp1 tnpA</i>       | Kmer       | Linked to<br><i>bla<sub>CTX-M-15</sub></i> | EU418923.1 (10812 - 10842, reverse)                         |     |         |      | 122       | 1         | -         | 19        | 34        | -         | 218.3         | 21.3                           | 1    | 18.3                          | 1           |
| CXM  | <i>β-lactamase genes</i> | SNP / gene | <i>bla<sub>CTX-M-15</sub></i>              | A0A075VKM9                                                  |     |         |      | 129       | 1         | -         | 13        | 33        | -         | 327.5         | 24.2                           | 1    | 23.4                          | 1           |
|      |                          | Kmer       | <i>bla<sub>CTX-M-24</sub></i>              | NC_022078.1 (127606 - 127633,<br>reverse)                   |     |         |      | 129       | 1         | -         | 13        | 33        | -         | 327.5         | 25.0                           | 772  | 23.4                          | 1480        |
|      | <i>ISEcp1 tnpA</i>       | Kmer       | Linked to<br><i>bla<sub>CTX-M-15</sub></i> | EU418923.1 (10812 - 10842, reverse)                         |     |         |      | 129       | 1         | -         | 12        | 34        | -         | 365.5         | 25.9                           | 1    | 26.6                          | 1           |
|      | <i>HP from ISEcp1</i>    | SNP / gene |                                            |                                                             |     |         |      | 129       | 1         | -         | 13        | 33        | -         | 327.5         | 24.2                           | 1    | 23.4                          | 1           |
|      | protein wbuC             | SNP / gene |                                            | AIG86706.1                                                  |     |         |      | 129       | 1         | -         | 13        | 33        | -         | 327.5         | 24.2                           | 1    | 23.4                          | 1           |
| CRO  | <i>β-lactamase genes</i> | SNP / gene | <i>bla<sub>CTX-M-15</sub></i>              | <a href="#">AIG86707.1</a>                                  |     |         |      | 140       | 1         | -         | 2         | 33        | -         | 2310          | 32.8                           | 1    | 60.5                          | 1           |
|      |                          | Kmer       | <i>bla<sub>CTX-M-24</sub></i>              | NC_022078.1 (127606 - 127633,<br>reverse)                   |     |         |      | 140       | 1         | -         | 2         | 33        | -         | 2310          | 35.4                           | 762  | 60.5                          | 803         |
|      | <i>HP from ISEcp1</i>    | SNP / gene |                                            |                                                             |     |         |      | 140       | 1         | -         | 2         | 33        | -         | 2310          | 32.8                           | 1    | 60.5                          | 1           |

|     |                                             |            |                                               |                                     |     |    |   |   |    |   |       |      |      |       |        |
|-----|---------------------------------------------|------------|-----------------------------------------------|-------------------------------------|-----|----|---|---|----|---|-------|------|------|-------|--------|
|     | protein wbuC                                | SNP / gene |                                               | AIG86706.1                          | 140 | 1  | - | 2 | 33 | - | 2310  | 32.8 | 1    | 60.5  | 1      |
|     | <i>ISEcp1 tnpA</i>                          | Kmer       | Linked to <i>bla<sub>CTX-M-15</sub></i>       | EU418923.1 (10812 - 10842, reverse) | 140 | 1  | - | 1 | 34 | - | 4760  | 36.7 | 1    | 76.0  | 1      |
| CIP | Plasmid-mediated quinolone resistance genes | SNP / gene | <i>aac(6)-Ib-c</i>                            | <a href="#">ACV60575.1</a>          | 138 | 4  | - | 8 | 26 | - | 112.1 | 20   | 5    | 16.7  | 4      |
|     |                                             | SNP / gene | <i>qnr-B1</i>                                 | <a href="#">A0A075VJL2</a>          | 140 | 2  | - | 9 | 25 | - | 194.4 | 20.7 | 2    | 19.5  | 2      |
|     |                                             | Kmer       | <i>qnr-B19</i>                                | JX298080.1 (481 – 511)              | 130 | 2  | - | 9 | 25 | - | 180.6 | 25.0 | 1846 | 19.5  | 4423   |
|     | tnpA (truncated)                            | Kmer       | Linked to <i>qnr-B19</i>                      | JX298080.1 (1520 – 1550)            | 135 | 7  | - | 3 | 31 | - | 199.3 | 27.3 | 1    | 28.5  | 1      |
|     | tnpA                                        | SNP / gene | Linked to aac                                 | BAD08693.1                          | 131 | 11 | - | 2 | 32 | - | 190.5 | 23.5 | 1    | 19.9  | 1      |
| GEN | aac                                         | SNP / gene | <i>aac(3)-II</i>                              | <a href="#">AHI38985.1</a>          | 145 | 0  | - | 0 | 31 | - | NA    | 36.8 | 1    | >100  | 1      |
|     |                                             | Kmer       | <i>aac(3)-II</i>                              | AJD77170.1(383 – 413)               | 145 | 0  | - | 0 | 31 | - | Inf   | 39.4 | 1    | 15.6  | 397987 |
|     |                                             | SNP / gene | <i>aac(6)</i>                                 | <a href="#">AIG86041.1</a>          | 141 | 4  | - | 5 | 26 | - | 183.3 | 22.1 | 6    | 18.6  | 7      |
|     | tmrB_2 (Tunicamycin resistance protein)     | Kmer       | Linked to aacA4 (314520 – 315119, complement) | CP011314.1 (310752 – 310782)        | 145 | 0  | - | 2 | 29 | - | Inf   | 36.5 | 519  | 146.4 | 1      |

|     |     |            |                  |                            |     |   |   |   |    |   |       |      |   |      |   |
|-----|-----|------------|------------------|----------------------------|-----|---|---|---|----|---|-------|------|---|------|---|
| TOB | aac | SNP / gene | <i>aac(3)-II</i> | AIG86707.1                 | 140 | 0 | - | 5 | 31 | - | Inf   | 30.4 | 1 | 43.3 | 1 |
|     |     | Kmer       | <i>aac(3)-II</i> | LK391770.1 (21132 - 21162) | 140 | 0 | - | 5 | 31 | - | Inf   | 33.0 | 1 | 43.3 | 1 |
|     | ant | SNP / gene | <i>aac(6)</i>    | <a href="#">AIG86041.1</a> | 139 | 1 | - | 7 | 29 | - | 575.6 | 25.6 | 3 | 27   | 3 |

Supplementary Table 3b. *Klebsiella pneumoniae* results for drugs where resistance is determined by the presence of a gene. CFZ = Cefazolin, CIP = Ciprofloxacin, CRO = Ceftriaxone, CXM = Cefuroxime, GEN = Gentamicin, TOB = Tobramycin. Case = phenotypically resistant, control = phenotypically sensitive. aac = Aminoglycoside N-acetyltransferase genes, ant = Aminoglycoside N-acetyltransferase genes, aph = Aminoglycoside O-phosphotransferase genes. Causal gene names are coloured according to their resistance causing mechanism, red if it's presence determines resistance, blue if substitutions within the gene causes resistance.

| Drug | Gene | Study | Variant         | Genome position (in reference genome)<br>or BLAST accession |                      | Alleles | Type | Ctrl<br>1 | Ctrl<br>2 | Ctrl<br>3 | Case<br>1 | Case<br>2 | Case<br>3 | Odds<br>ratio          | -<br>log10(<br>p) | Rank | -<br>log10(p)<br>LMM | Rank<br>LMM |
|------|------|-------|-----------------|-------------------------------------------------------------|----------------------|---------|------|-----------|-----------|-----------|-----------|-----------|-----------|------------------------|-------------------|------|----------------------|-------------|
|      |      |       |                 | Pre-LMM                                                     | LMM                  |         |      |           |           |           |           |           |           |                        |                   |      |                      |             |
|      |      |       |                 |                                                             |                      |         |      |           |           |           |           |           |           |                        |                   |      |                      |             |
| EMB  | embB | SNP   | M306L,<br>M306V | 4247429                                                     |                      | A, G, C | NS   | 1586      | 2         | 1         | 24        | 16        | 1         | 528.7,<br>66.1,<br>0.1 | 25.6              | 2    | 82.8                 | 1           |
|      |      | Kmer  |                 | 4247429 - 4247459                                           |                      |         |      | 31        | 1558      | -         | 31        | 10        | -         | 0.006                  | 130.2             | 1    | 107.5                | 1           |
|      | rpoB | SNP   | S450L,<br>S450W | 761155                                                      |                      | C, T, G | NS   | 1563      | 23        | 3         | 17        | 23        | 1         | 91.9,<br>30.6<br>0.333 | 27.5              | 1    | 45.9                 | 2           |
| INH  | katG | SNP   | S315T           | 2155168                                                     |                      | C, G    | NS   | 1468      | 2         | -         | 86        | 153       | -         | 2475.8                 | 151.1             | 1    | 169.4                | 1           |
|      |      | Kmer  |                 | 2155145 -<br>2155175                                        | 2155145 -<br>2155175 |         |      | 1468      | 2         | -         | 87        | 152       | -         | 1282.4                 | 220.9             | 1    | 172.4                | 1           |
| PZA  | pncA | SNP   | V125G           | 2288868                                                     | 2288868              | A, C    | NS   | 1662      | 0         | -         | 41        | 4         | -         | Inf                    | 7.2               | 142  | 60.0                 | 1           |
|      |      | Kmer  |                 | 2288847 - 2288877                                           | 2288847 - 2288877    |         |      | 1662      | 0         | -         | 41        | 4         | -         | Inf                    | 33.3              | 7890 | 60.0                 | 1           |
|      |      | Kmer  |                 |                                                             |                      |         |      | 1         | 1661      | -         | 7         | 38        | -         | 0.003                  | 50.2              | 174  | 25.7                 | 653         |
|      | rpoB | SNP   | S450L,<br>S450W | 761155                                                      | 761155               | C, T, G | NS   | 1632      | 28        | 2         | 23        | 21        | 1         | 53.2,<br>35.5,<br>0.7  | 22.3              | 1    | 54.4                 | 2           |
| RIF  | rpoB | SNP   | S450L,<br>S450W | 761155                                                      | 761155               | C, T, G | NS   | 1486      | 0         | 1         | 34        | 49        | 3         | Inf,<br>131.1, 0       | 73.2              | 1    | 269.8                | 1           |
|      |      | Kmer  |                 | 761136 - 761166                                             | 761136 - 761166      |         |      | 7         | 1480      | -         | 70        | 16        | -         | 0.001                  | 250.0             | 1    | 0                    | 1           |
|      |      | Kmer  |                 | 761126 - 761156                                             | 761126 - 761156      |         |      | 6         | 1481      | -         | 66        | 20        | -         | 0.001                  | 237.2             | 14   | 321.7                | 1           |

**Supplementary Table 3c. *Mycobacterium tuberculosis* results. EMB = Ethambutol, INH = Isoniazid, PZA = Pyrazinamide, RIF = Rifampicin. Case = phenotypically resistant, control = phenotypically sensitive. Causal gene names are coloured according to their resistance causing mechanism, red if it's presence determines resistance, blue if substitutions within the gene causes resistance.**

| Drug           | Gene           | Study      | Variant                                  | Genome position (in reference genome) or BLAST accession |                       | Alleles | Type                       | Ctrl 1                           | Ctrl 2 | Ctrl 3 | Case 1 | Case 2 | Case 3 | Odds ratio       | -log <sub>10</sub> (p) | Rank   | -log <sub>10</sub> (p) LMM | Rank LMM |
|----------------|----------------|------------|------------------------------------------|----------------------------------------------------------|-----------------------|---------|----------------------------|----------------------------------|--------|--------|--------|--------|--------|------------------|------------------------|--------|----------------------------|----------|
|                |                |            |                                          | Pre-LMM                                                  | LMM                   |         |                            |                                  |        |        |        |        |        |                  |                        |        |                            |          |
| CIP            | <i>griA</i>    | SNP / gene | S80F, S80Y, F80Y                         | 1419998                                                  |                       | C, T, A | NS, NS, NS                 | 745                              | 5      | 0      | 14     | 226    | 2      | 2405.3, Inf, Inf | 198.6                  | 1      | 138.2                      | 1        |
|                |                | Kmer       |                                          | 1419968-1420098                                          |                       |         |                            | 745                              | 5      | -      | 18     | 224    | -      | 1854.2           | 190.5                  | 1      | 99.1                       | 9        |
|                |                | Kmer       |                                          | 1419995-1420025                                          |                       |         |                            | 22                               | 728    | -      | 228    | 14     | -      | 0.002            | 177.2                  | 46     | 113.6                      | 1        |
|                | <i>gyrA</i>    | SNP / gene | S84L                                     | 7255                                                     |                       | C, T    | NS                         | 745                              | 5      | -      | 20     | 222    | -      | 1653.9           | 190.3                  | 2      | 81.6                       | 2        |
|                |                | Kmer       |                                          | 7726 - 7756                                              |                       |         |                            | 6                                | 744    | -      | 223    | 19     | -      | 0.0007           | 188.3                  | 23     | 82.3                       | 47       |
| ERY            | <i>ermC</i>    | SNP / gene | Q2FDD1                                   |                                                          |                       |         |                            | 774                              | 2      | -      | 103    | 113    | -      | 424.6            | 85.0                   | 1      | 193.5                      | 1        |
|                |                | Kmer       |                                          | NC_022228.1 (743-781)                                    | NC_022228.1 (279-309) |         |                            | 770                              | 6      | -      | 102    | 114    | -      | 143.4            | 94.7                   | 1      | 192.4                      | 12       |
|                | <i>ermA</i>    | SNP / gene | P0A0H3                                   |                                                          |                       |         |                            | 775                              | 1      | -      | 121    | 95     | -      | 608.5            | 70.7                   | 12     | 75.7                       | 3        |
|                | <i>ermT</i>    | SNP / gene |                                          |                                                          |                       |         |                            | clusters with ermA in pan-genome |        |        |        |        |        |                  |                        |        |                            |          |
|                |                | Kmer       | Intergenic, 30bp upstream to <i>ermC</i> | AE002098.2 (75634-75664)                                 |                       |         |                            | 772                              | 4      | -      | 106    | 110    | -      | 200.3            | 93.1                   | 92     | 195.7                      | 1        |
| FUS            | <i>fusA</i>    | SNP / gene | L461-, L461S, -461S                      | 601084                                                   |                       | T, A, C | Nonsense, NS, read-through | 908                              | 0      | -      | 83     | 1      | -      | Inf              | 11.0                   | 9754   | 62.3                       | 1        |
|                |                | kmer       |                                          | 601054-601084                                            |                       |         |                            | 1                                | 907    | -      | 18     | 66     | -      | 0.004            | 41.6                   | 115876 | 157.4                      | 1        |
|                | <i>fusC</i>    | SNP / gene | Q8GNY5                                   |                                                          |                       |         |                            | 908                              | 0      | -      | 40     | 44     | -      | Inf              | 54.3                   | 4      | 19.3                       | 39       |
|                |                | kmer       |                                          | NC_002953.3 (53216-53246)                                |                       |         |                            | 908                              | 0      | -      | 36     | 48     | -      | Inf              | 119.9                  | 75     | 39.7                       | 58       |
|                | <i>fusB</i>    | SNP / gene | Q8GNY5                                   |                                                          |                       |         |                            | 908                              | 0      | -      | 76     | 8      | -      | Inf              | 9.6                    | 18494  | 16.6                       | 76       |
|                | <i>SAS0040</i> | Kmer       |                                          |                                                          |                       |         |                            | 908                              | 0      | -      | 35     | 49     | -      | Inf              | 122.5                  | 1      | 45.4                       | 36       |
|                | <i>SAS0037</i> | SNP / gene |                                          |                                                          |                       |         |                            | 908                              | 0      | -      | 38     | 46     | -      | Inf              | 57.0                   | 1      | 28.5                       | 21       |
| <i>SAS0040</i> | SNP / gene     |            |                                          |                                                          |                       |         | 908                        | 0                                | -      | 38     | 46     | -      | Inf    | 57.0             | 1                      | 28.5   | 21                         |          |

|     |                               |               |          |                               |      |    |  |     |     |    |    |    |     |        |         |       |       |       |   |
|-----|-------------------------------|---------------|----------|-------------------------------|------|----|--|-----|-----|----|----|----|-----|--------|---------|-------|-------|-------|---|
| GEN | <i>aacA/aphD</i>              | SNP / gene    | P0A0C1   |                               |      |    |  |     | 981 | 0  | -  | 2  | 9   | -      | Inf     | 21.1  | 1     | 380.8 | 1 |
|     |                               | Kmer          | -        | AY971367.1 (727-2683)         |      |    |  |     | 981 | 0  | -  | 2  | 9   | -      | Inf     | 177.4 | 1     | 380.8 | 1 |
|     | <i>GNAT acetyltransferase</i> | SNP / gene    | D2J631   |                               |      |    |  |     | 981 | 0  | -  | 2  | 9   | -      | Inf     | 21.1  | 1     | 380.8 | 1 |
| MET | <i>mecA</i>                   | SNP / gene    | P60185   |                               |      |    |  |     | 773 | 4  | -  | 3  | 212 | -      | 13656.3 | 209.6 | 1     | 374.9 | 1 |
|     |                               | Kmer          |          | NC_022604.1 (78438- 78468)    |      |    |  |     | 772 | 4  | -  | 3  | 213 | -      | 13703   | 208.2 | 1     | 375.6 | 1 |
|     |                               | HP in SCC-mec | SNP/gene |                               |      |    |  |     | 773 | 4  | -  | 3  | 212 | -      | 13656.3 | 209.6 | 1     | 374.9 | 1 |
| PEN | <i>blaZ</i>                   | SNP / gene    | P00807   |                               |      |    |  |     | 145 | 23 | -  | 28 | 796 | -      | 179.2   | 118.6 | 1     | 140.1 | 1 |
|     |                               | Kmer          |          | NC_022604.1 (2824752-2824782) |      |    |  |     | 143 | 25 | -  | 9  | 815 | -      | 518.0   | 166.4 | 2     | 210.5 | 2 |
|     |                               | <i>blaI</i>   |          | NC_022604.1 (2822414-2822444) |      |    |  |     | 142 | 26 | -  | 7  | 817 | -      | 637.4   | 167.8 | 1     | 216.2 | 1 |
| RIF | <i>rpoB</i>                   | SNP / gene    | H481Y    | 592271                        | C, T | NS |  | 983 | 1   | -  | 3  | 5  | -   | 1638.3 | 11.1    | 1     | 158.6 | 1     |   |
|     |                               | kmer          |          | 592260-592290                 |      |    |  | 2   | 982 | -  | 6  | 2  | -   | 0.0007 | 122.0   | 1     | 177.9 | 1     |   |
| TET | <i>tetK</i>                   | SNP / gene    | B0FYM6   |                               |      |    |  |     | 945 | 1  | -  | 9  | 37  | -      | 3885    | 58.0  | 2     | 315.4 | 2 |
|     |                               | Kmer          |          | KM281803.1 (1198-1228)        |      |    |  |     | 945 | 1  | -  | 4  | 42  | -      | 9922.5  | 192.6 | 1     | 464.1 | 1 |
|     | <i>tetL</i>                   |               |          |                               |      |    |  |     |     |    |    |    |     |        |         |       |       |       |   |
|     | <i>tetM</i>                   |               |          |                               |      |    |  |     |     |    |    |    |     |        |         |       |       |       |   |
|     | <i>repC</i>                   | SNP / gene    | Q5701    |                               |      |    |  |     | 944 | 2  | -  | 6  | 40  | -      | 3146.7  | 62.9  | 1     | 364.6 | 1 |
| TRI | <i>dfrB</i>                   | SNP / gene    | F99Y     | 1497290                       | A, T | NS |  | 308 | 0   | -  | 10 | 5  | -   | Inf    | 7.9     | 1     | 28.5  | 1     |   |
|     |                               | Kmer          |          | 1497269- 1497299              |      |    |  |     | 308 | 0  | -  | 10 | 5   | -      | Inf     | 23.8  | 1     | 28.5  | 1 |
|     | <i>dfrG</i>                   | SNP/gene      |          |                               |      |    |  |     | 308 | 0  | -  | 12 | 3   |        | Inf     | 4.9   | 2     | 16.1  | 1 |
|     | <i>dfrA</i>                   |               |          |                               |      |    |  |     |     |    |    |    |     |        |         |       |       |       |   |
|     | <i>orf1</i>                   | SNP/gene      |          |                               |      |    |  |     | 308 | 0  | -  | 12 | 3   |        | Inf     | 4.9   | 2     | 16.1  | 1 |
|     | <i>LPXTG surface protein</i>  | SNP/gene      |          |                               |      |    |  |     | 301 | 7  | -  | 9  | 6   |        | 28.7    | 5.6   | 1     | 13.5  | 2 |

Supplementary Table 3d. *Staphylococcus aureus* results. CIP = Ciprofloxacin, ERY = Erythromycin, FUS = Fusidic acid, GEN = Gentamicin, MET = Methicillin, PEN = Penicillin, RIF = Rifampicin, TET = Tetracycline, TRI = Trimethoprim. Case = phenotypically resistant, control = phenotypically sensitive. Causal gene names are coloured according to their resistance causing mechanism, red if it's presence determines resistance, blue if substitutions within the gene causes resistance.



| Species                           | Minor allele frequency (%) |        |        |         |          |          |
|-----------------------------------|----------------------------|--------|--------|---------|----------|----------|
|                                   | 0 – 1%                     | 1 – 2% | 2 – 5% | 5 – 10% | 10 – 20% | 20 – 50% |
| <i>Escherichia coli</i>           | 26.5                       | 9.0    | 11.4   | 10.7    | 12.9     | 29.5     |
| <i>Klebsiella pneumoniae</i>      | 21.2                       | 11.3   | 17.1   | 17.1    | 16.5     | 16.8     |
| <i>Mycobacterium tuberculosis</i> | 93.9                       | 1.8    | 1.6    | 1.0     | 1.1      | 0.7      |
| <i>Staphylococcus aureus</i>      | 49.2                       | 6.9    | 6.5    | 9.7     | 5.2      | 22.5     |

**Supplementary Table 4. Distribution of minor allele frequencies for biallelic SNPs.**

| Species                           | GWAS studies                                                                                                                       | Reference genome for mapping                                                                       | # Biallelic SNPs | # Triallelic SNPs | # Tetra-allelic SNPs | # Kmers  | # Gene clusters |
|-----------------------------------|------------------------------------------------------------------------------------------------------------------------------------|----------------------------------------------------------------------------------------------------|------------------|-------------------|----------------------|----------|-----------------|
| <i>Staphylococcus aureus</i>      | Ciprofloxacin, Erythromycin, Fusidic acid, Gentamicin, Penicillin, Methicillin, Tetracycline, Rifampicin                           | <i>Staphylococcus aureus</i> MRSA252 (GenBank accession no. BX571856.1)                            | 264604           | 14731             | 519                  | 24154606 | 13881           |
|                                   | Trimethoprim                                                                                                                       | <i>Staphylococcus aureus</i> MRSA252 (GenBank accession no. BX571856.1)                            | 196996           | 8712              | 269                  | 15840354 | 10261           |
| <i>Escherichia coli</i>           | $\beta$ -lactam: Ampicillin, Cefazidime, Cefuroxime, Ceftriaxone; Quinolone: Ciprofloxacin; Aminoglycoside: Gentamicin, Tobramycin | <i>Escherichia coli</i> CFT073 (Genbank accession AE014075.1)                                      | 417645           | 25298             | 1287                 | 39918870 | 23502           |
| <i>Klebsiella pneumoniae</i>      | $\beta$ -lactam: Ampicillin, Cefazidime, Cefuroxime, Ceftriaxone; Quinolone: Ciprofloxacin; Aminoglycoside: Gentamicin, Tobramycin | <i>Klebsiella pneumoniae</i> subsp. <i>pneumoniae</i> MGH 78578 (GenBank accession no. CP000647.1) | 654425           | 63639             | 5029                 | 53816250 | 21382           |
| <i>Mycobacterium tuberculosis</i> | Ethambutol                                                                                                                         | <i>Mycobacterium tuberculosis</i> H37Rv (GenBank accession no. NC_000962.2)                        | 107480           | 954               | 8                    | 15680376 | -               |
|                                   | Isoniazid                                                                                                                          | <i>Mycobacterium tuberculosis</i> H37Rv (GenBank accession no. NC_000962.2)                        | 110400           | 1020              | 10                   | 15941713 | -               |
|                                   | Pyrazinamide                                                                                                                       | <i>Mycobacterium tuberculosis</i> H37Rv (GenBank accession no. NC_000962.2)                        | 110162           | 1012              | 10                   | 15963479 | -               |
|                                   | Rifampicin                                                                                                                         | <i>Mycobacterium tuberculosis</i> H37Rv (GenBank accession no. NC_000962.2)                        | 101968           | 864               | 8                    | 15554437 | -               |

**Supplementary Table 5. Variant information for all GWAS studies.**
